# 1 On the normative advantages of 2 dopamine and striatal opponency for 3 learning and choice

4 Alana Jaskir<sup>1\*</sup> and Michael J Frank<sup>1\*</sup>

\*For correspondence:

[alana\\_jaskir@brown.edu](mailto:alana_jaskir@brown.edu) (AJ);

[michael\\_frank@brown.edu](mailto:michael_frank@brown.edu) (MJF)

5 <sup>1</sup>Department of Cognitive, Linguistic and Psychological Sciences, Carney Institute for  
6 Brain Science, Brown University, Providence, United States

7 

---

8 **Abstract** Much research focuses on how the basal ganglia (BG) and dopamine (DA) contribute  
9 to reward-driven behavior. But BG circuitry is notoriously complex, with two opponent pathways  
10 interacting via several disinhibitory mechanisms, which are in turn modulated by DA. Building on  
11 earlier models, we propose a new model, OpAL\*, to assess the normative advantages of such  
12 circuitry in cost-benefit decision making. OpAL\* dynamically modulates DA as a function of  
13 learned reward statistics, differentially amplifying the striatal pathway most specialized for the  
14 environment. OpAL\* exhibits robust advantages over traditional and alternative BG models  
15 across a range of environments, particularly those with sparse reward. These advantages depend  
16 on opponent and nonlinear Hebbian plasticity mechanisms previously thought to be pathological.  
17 Finally, OpAL\* captures patterns of risky choice arising from manipulations of DA and  
18 environmental richness across species, suggesting that such choice patterns result from a  
19 normative biological mechanism.

20 

---

21 *Everybody wants the most they can possibly get*  
22 *For the least they can possibly do*  
23 – Todd Snider, "Easy Money"

## 24 Introduction

25 Everyday choices involve integrating and comparing the subjective benefits and costs of potential  
26 actions. Moreover, the degree to which one prioritizes costs or benefits may vary between and  
27 even within individuals. For example, one may typically use food preference to guide their choice  
28 of restaurant, but be more likely to minimize costs (e.g., speed, distance, price) when only low  
29 quality options are available (only fast-food restaurants are open). In this paper, we evaluate the  
30 computational advantages of such context-dependent choice strategies and how they may arise  
31 from biological properties within the basal ganglia (BG) and dopamine (DA) system. We find that  
32 biological properties within this system – specifically, the presence of opponent striatal pathways,  
33 nonlinear Hebbian plasticity, and dynamic changes in dopamine as a function of reward history  
34 – confer decision making advantages relative to canonical reinforcement learning models lacking  
35 these properties.

36 In neural network models of such circuitry, the cortex "proposes" candidate actions available  
37 for consideration, and the BG facilitates those that are most likely to maximize reward and min-  
38 imize cost (Frank, 2005; Ratcliff and Frank, 2012; Franklin and Frank, 2015; Gurney et al., 2015;  
39 Dunovan and Verstynen, 2016). These models are based on the BG architecture in which striatal

40 medium spiny neurons (MSNs) are subdivided into two major populations that respond in oppo-  
41 nent ways to DA (due to differential expression of D1 and D2 receptors; *Gerfen (1992)*). Phasic DA  
42 signals convey reward prediction errors (*Montague et al., 1996; Schultz et al., 1997*), amplifying  
43 both activity and synaptic learning in D1 neurons, thereby promoting action selection based on  
44 reward. Conversely, when DA levels drop, activity is amplified in D2 neurons, promoting learning  
45 and choice that minimizes disappointment (*Frank, 2005; Iino et al., 2020*).

46 Empirically, the BG and DA have been strongly implicated in such motivated action selection  
47 and reinforcement learning across species. For example, in perceptual decisions, striatal D1 and  
48 D2 neurons combine information about veridical perceptual data with internal preferences based  
49 on potential reward, causally influencing choice toward the more rewarding options (*Doi et al.,*  
50 *2020; Bolkan et al., 2022*). Further, striatal DA manipulations influence reinforcement learning  
51 (*Yttri and Dudman, 2016; Frank et al., 2004; Pessiglione et al., 2006a*), motivational vigor (*Niv et al.,*  
52 *2007; Beeler et al., 2012; Hamid et al., 2015*), cost-benefit decisions about physical effort (*Salamone*  
53 *et al., 2018*) and risky decision making. Indeed, as striatal DA levels rise, humans and animals are  
54 more likely to select riskier options that offer greater potential payout than those with certain but  
55 smaller rewards (*St Onge and Floresco, 2009; Zolocusky et al., 2016; Rutledge et al., 2015*), an effect  
56 that has been causally linked to striatal D2 receptor-containing subpopulations (*Zolocusky et al.,*  
57 *2016*).

58 However, for the large part, this literature has focused on the findings *that* DA has opponent  
59 effects on D1 and D2 populations and behavioral patterns, and not what the computational advan-  
60 tage of this scheme might be (i.e., *why*). For example, the Opponent Actor Learning (OpAL) model  
61 (*Collins and Frank, 2014*) summarizes the core functionality of the BG neural network models in  
62 algorithmic form, capturing a wide variety of findings of DA and D1 vs D2 manipulations across  
63 species (for review, *Collins and Frank (2014); Maia and Frank (2017)*). Two distinguishing features  
64 of OpAL (and its neural network inspiration), compared to more traditional RL models, are that (i)  
65 it relies on opponent D1/D2 representations rather than a single expected reward value for each  
66 action and (ii) learning in such populations is acquired through nonlinear dynamics, mimicking  
67 three-factor hebbian plasticity rules. This nonlinearity causes the two populations to evolve to  
68 specialize in discriminating between options of high or low reward value, respectively *Collins and*  
69 *Frank (2014)*. It is also needed to explain pathological conditions such as learned Parkinsonism,  
70 whereby low DA states induce hyperexcitability in D2 MSNs, driving aberrant plasticity and in turn,  
71 progression of symptoms (*Wiecki et al., 2009; Beeler et al., 2012*).

72 But why would the brain develop this nonlinear opponent mechanism for action selection and  
73 learning, and how could (healthy) DA levels be adapted to capitalize on it? A clue to this question lies  
74 in the observation that standard (non-biological) RL models typically perform worse at selecting the  
75 optimal action in "lean environments" with sparse rewards than they do in "rich environments" with  
76 plentiful rewards (*Collins and Frank, 2014*). This asymmetry results from a difference in exploration  
77 / exploitation tradeoffs across such environments. In rich environments, an agent can benefit  
78 from overall higher levels of exploitation: once the optimal action is discovered, an agent can stop  
79 sampling alternative actions as it is not important to know their precise values. In contrast, in lean  
80 environments, choosing the optimal action typically lowers its value (due to sparse rewards), to the  
81 point that it can drop below those of even more suboptimal actions. Higher levels of exploration  
82 are therefore needed to accurately learn the value of the worse options in order to avoid them  
83 more reliably in the long run. Moreover, while in computer science applications one might be able  
84 to simply tune hyperparameters of an RL model for a given environment, ecologically, an agent  
85 cannot know whether it is in a rich or lean environment in advance.

86 In this paper, we investigate the utility of nonlinear basal ganglia opponency for adaptive behav-  
87 ior in rich and lean environments. We propose a new model, OpAL\*, which (as observed empiri-  
88 cally; *Hamid et al. (2015)*) dynamically adapts its dopaminergic state online as a function of learned  
89 reinforcement statistics of the environment. Specifically, OpAL\* modulates its dopaminergic states  
90 in proportion to its estimates of "environmental richness", leading to dynamically evolving high DA

91 motivational states in rich environments and lower DA states in lean environments with sparse  
92 rewards. This dynamic modulation amplifies the D1 or D2 actor most well suited to discriminate  
93 amongst benefits or costs of choice options for the given environment, akin to an efficient coding  
94 strategy. We compared the performance of OpAL\* to several baseline models (including alterna-  
95 tive formulations of striatal opponency; *Möller and Bogacz (2019)*), to specifically test the need for  
96 the biological mechanisms in support of adaptive behavior. We find that OpAL\* optimizes action  
97 selection across a range of environments with varying reward rates and complexity levels, and  
98 across a wide range of parameter settings. This advantage depends on opponency, nonlinearity,  
99 and adaptive DA modulation and is most prominent in lean environments, an ecologically prob-  
100 able environment which requires more adaptive navigation of explore-exploit as outlined above.  
101 OpAL\* also addresses limitations of the original OpAL model highlighted by *Möller and Bogacz*  
102 *(2019)*, while retaining key properties needed to capture a range of empirical data and afford the  
103 normative advantages. Finally, we apply OpAL\* to capture a range of empirical data across species,  
104 including how risk preference changes as a function of D2 MSN activity and manipulations that  
105 are not explainable by monolithic RL systems even when made sensitive to risk (*Zalocusky et al.,*  
106 *2016*). In humans, we show that OpAL\* can reproduce patterns in which dopaminergic drug ad-  
107 ministration selectively increases risky choices for gambles with potential gains (*Rutledge et al.,*  
108 *2015*). Moreover, we show that even in absence of biological manipulations, OpAL\* also accounts  
109 for recently described economic choice patterns as a function of environmental richness. In par-  
110 ticular, we simulate data showing that when offered the very same safe and risky choice option,  
111 humans are more likely to gamble when that offer had been presented in a the context of a richer  
112 reward distribution (*Frydman and Jin, 2021*). Taken together, our simulations provide a clue as to  
113 the normative function of the biology of RL which differs from that assumed by standard models  
114 and gives rise to variations in risky decision making.

### 115 **OpAL overview**

116 Before introducing OpAL\*, we first provide an overview of the original OpAL model (*Collins and*  
117 *Frank, 2014*), an algorithmic model of the basal ganglia whose dynamics mimic the differential  
118 effects of dopamine in the D1/D2 pathways described above. OpAL is a modified "actor-critic"  
119 architecture (*Sutton and Barto, 2018*). In the standard actor-critic, the critic learns the expected  
120 value of an action from rewards and punishments and reinforces the actor to select those actions  
121 that maximize rewards. Specifically, after selecting an action ( $a$ ), the agent experiences a reward  
122 prediction error ( $\delta$ ) signaling the difference between the reward received ( $R$ ) and the critic's learned  
123 expected value of the action ( $V_t(a)$ ) at time  $t$ :

$$\delta_t = R_t - V_t(a) \quad (1)$$

$$V_{t+1}(a) = V_t(a) + \alpha \times \delta_t, \quad (2)$$

124 where  $\alpha$  is a learning rate. The actor then selects actions based on their relative action propen-  
125 sities, using a softmax decision rule:

$$p(a) = \frac{e^{Act_t(a)}}{\sum_{i \in A} e^{Act_t(i)}}, \quad (3)$$

126 where  $Act$  values are updated as a function of reward prediction errors in the critic, such that  
127 the agent selects those actions that yield the most frequent positive RPEs. OpAL is distinguished  
128 from a standard actor-critic in two critical ways, motivated by the biology summarized above. First,  
129 it has two separate opponent actors: one promoting selection ("Go") of an action  $a$  in proportion  
130 to its relative benefit over alternatives, and the other suppressing selection of that action ("NoGo")

131 in proportion to its relative cost (or disappointment).<sup>1</sup> Second, the update rule in each of these  
132 actors contains a *three-factor Hebbian rule* such that weight updating is proportional not only to  
133 learning rates and RPEs (as in standard RL) but is also scaled by  $G_t$  and  $N_t$  themselves. In particular,  
134 positive RPEs conveyed by phasic DA bursts strengthen the  $G$  (D1) actor and weaken the  $N$  (D2)  
135 actor, whereas negative RPEs weaken the D1 actor and strengthen the D2 actor.

$$G_{t+1}(a) = G_t(a) + \alpha_G G_t(a) \times \delta_t \quad (4)$$

$$N_{t+1}(a) = N_t(a) + \alpha_N N_t(a) \times -\delta_t \quad (5)$$

136 where  $\alpha_G$  and  $\alpha_N$  are learning rates controlling the degree to which D1 and D2 neurons adjust their  
137 synaptic weights with each RPE. We will refer to these  $G_t$  and  $N_t$  terms that multiply the RPE in the  
138 update as the "Hebbian term", because weight changes grow with activity in the corresponding  $G$   
139 and  $N$  units. As such, the  $G$  weights grow to represent the benefits of candidate actions (those that  
140 yield positive RPEs more often, thereby making them yet more eligible for learning), whereas the  
141  $N$  weights grow to represent the costs or likelihood of disappointment (those that yield negative  
142 RPEs more often).

143 The resulting nonlinear dynamics capture biological plasticity rules in neural networks, where  
144 learning depends on dopamine ( $\delta$ ), presynaptic activation in the cortex (the proposed action  $a$  is se-  
145 lectively updated), and postsynaptic activation in the striatum ( $G_t$  or  $N_t$ ) (Frank, 2005; Wiecki et al.,  
146 2009; Beeler et al., 2012; Gurney et al., 2015; Frémaux and Gerstner, 2016; Reynolds and Wickens,  
147 2002). Incorporation of this Hebbian term prevents redundancy in the D1 vs D2 actors and confers  
148 additional flexibility, as described in the next section. It is also necessary for capturing a variety  
149 of behavioral data, including those associated with pathological aberrant learning in DA-elevated  
150 and depleted states, whereby heightened striatal activity in either pathway amplifies learning that  
151 escalates over experience (Wiecki et al., 2009; Beeler et al., 2012; Collins and Frank, 2014).

152 For action selection (decision-making), OpAL combines together  $G_t(a)$  and  $N_t(a)$  into a single  
153 action value,  $Act_t(a)$ , but where the contributions of each opponent actor are weighted by corre-  
154 sponding gains  $\beta_g$  and  $\beta_n$ .

$$Act_t(a) = \beta_g G_t(a) - \beta_n N_t(a) \quad (6)$$

$$\beta_g = \beta(1 + \rho) \quad (7)$$

$$\beta_n = \beta(1 - \rho) \quad (8)$$

$$(9)$$

155 Here,  $\rho$  reflects the (*dopaminergic state*) controlling the relative weighting of  $\beta_g$  and  $\beta_n$ , and  $\beta$  is  
156 the overall softmax temperature. Higher  $\beta$  values correspond to higher exploration, while  $\beta = 0$   
157 would generate random choice independent of learned values. When  $\rho = 0$ , the dopaminergic  
158 state is "balanced" and the two actors  $G$  and  $N$  (and hence, learned benefits and costs) are equally  
159 weighted during choice. If  $\rho > 0$ , benefits are weighted more than costs, and vice-versa if  $\rho < 0$ .  
160 While the original OpAL model assumed a fixed, static  $\rho$  per simulated agent to capture individual  
161 differences or pharmacological manipulations, below we augmented it to include the contributions  
162 of dynamic changes in dopaminergic state, so that  $\rho$  can evolve over the course of learning to  
163 optimize choice.

## 164 **Nonlinear OpAL dynamics support amplification of action-value differences**

165 After learning,  $G$  and  $N$  weights correlate positively and negatively with expected reward, with ap-  
166 propriate rankings of each action preserved in the combined action value  $Act$  (Collins and Frank,

<sup>1</sup>For clarity, "benefits" and "costs" are evaluations relative to the critic's expectation. The exact numeric value is not inter-  
pretable. Rather, high benefits ( $G$ ) convey that an action is better than expected more often; high costs ( $N$ ) convey that an  
action more often disappoints relative to the critic's expectations.

167 **2014**). Nevertheless, the Hebbian term induces nonlinear dynamics in the two actors such that  
168 they are not redundant and instead specialize in discriminating between different reward proba-  
169 bility ranges (Figure 1). While the  $G$  actor shows greater discrimination among frequently rewarded  
170 actions, the  $N$  actor learns greater sensitivity among actions with sparse reward. Note that if  $G$  and  
171  $N$  actors are weighted equally in the choice function ( $\rho = 0$ ), the resultant choice preference is in-  
172 variant to translations across levels of reward, exhibiting identical discrimination between a 90%  
173 and 80% option as it would between a 80% and 70% option. This "balanced" OpAL model there-  
174 fore effectively reduces to a standard non-opponent RL model, but as such, fails to capitalize on  
175 the underlying specialization of the actors ( $G$  and  $N$ ) in ongoing learning. We considered the possi-  
176 bility that such specialization could be leveraged dynamically to amplify a given actor's contribution  
177 when it is most sensitive, akin to an "efficient coding" strategy (*Frydman and Jin, 2021*).

## 178 **OpAL\***

179 Given the differential specialization of  $G$  vs  $N$  actors, we considered whether the critic's online  
180 estimation of environmental richness (reward rate) could be used to control dopaminergic states  
181 (as seen empirically; (*Hamid et al., 2015; Mohebi et al., 2019*)). Due to its opponent effects on  
182 D1 vs D2 populations, such a mechanism would differentially and adaptively weight  $G$  vs  $N$  actor  
183 contributions to the choice policy. To formalize this hypothesis, we constructed OpAL\*, which uses  
184 an online estimation of environment richness to dynamically amplify the contribution of the actor  
185 theoretically best specialized for the environment type.

186 To provide a robust estimate of reward probability in a given environment, OpAL\* first replaces  
187 the standard critic with a Bayesian critic (so that value estimates are updated in proportion to un-  
188 certainty; see *Franklin and Frank (2015)* for possible striatal implementations of Bayesian learning  
189 via cholinergic interactions with dopamine in spiny cells). As such, the probability of reward for  
190 a given action  $\hat{p}(r, a)$  is represented by a beta distribution rather than a point estimate. The critic  
191 then generates a prediction error as the obtained reward relative to the expected value of an ac-  
192 tion using the mean of the beta distribution,  $\hat{p}_t(r, a)$ , multiplied by the magnitude of reward  $R_{mag}$   
193 and loss  $L_{mag}$ . Unless otherwise noted, simulations in this paper use  $R_{mag} = 1$  and  $L_{mag} = 0$ .

$$\alpha_{t+1}^c(a) = \alpha_t^c(a) + R_t \quad (10)$$

$$\beta_{t+1}^c(a) = \beta_t^c(a) + (1 - R_t) \quad (11)$$

$$X \sim \text{Beta}(\alpha_t^c(a), \beta_t^c(a)) \quad (12)$$

$$\hat{p}_t(r, a) = E[X] \quad (13)$$

$$V_t(a) = R_{mag} \times \hat{p}_t(r, a) + L_{mag} \times (1 - \hat{p}_t(r, a)), \quad (14)$$

194 where  $\alpha^c$  and  $\beta^c$  are hyperparameters of the beta distribution. This prediction error is then  
195 used to train the  $G$  and  $N$  actors, as noted above. OpAL\* also uses a beta distribution to estimate  
196  $\hat{p}_t(r)$  for the environment as a whole (i.e., over all actions), or "state-value", by combining the alpha  
197 and betas from each action. The dopaminergic state  $\rho$  is then increased when  $\hat{p}_t(r) > .5$  (*rich en-*  
198 *vironment*), and decreased when  $\hat{p}_t(r) < .5$  (*lean environment*). To ensure that dopaminergic states  
199 accurately reflect environmental richness, we apply a conservative rule to modulate  $\rho$  only when  
200 the critic is sufficiently "confident" that the reward rates are above or below 0.5, that is, we take  
201 into account not only the mean but also the variance of the beta distribution, parameterized by  
202  $\phi$  (Equation 16). This process is akin to performing inference over the most likely environmental  
203 state to guide DA.<sup>2</sup> Lastly, a constant  $k$  controls the strength of the modulation (Equation 17)

<sup>2</sup>One can adjust DA without the conservative inference process but there is a cost to misestimation of environmental richness that can arise due to stochasticity in any given environment, which can lead to reliance on the wrong actor; see Appendix. Although we focus on the Bayesian implementation here, other heuristics for achieving the same desideratum can be applied, for example waiting a fixed number of trials before changing the dopaminergic state using a standard RL critic. However, using a beta distribution (whose mean implicitly incorporates uncertainty) and explicitly adapting according to the distributions' standard deviation isolates whether any differences in performance between OpAL\* and a baseline model with fixed dopamine-

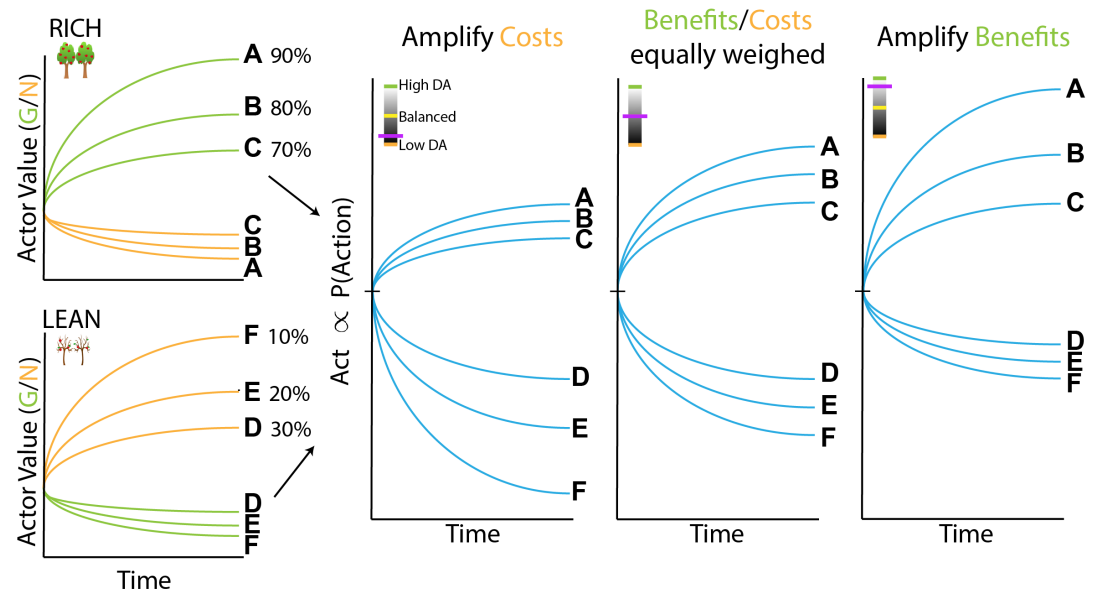

(a) Schematic of OpAL dynamics with three-factor Hebbian term. Nonlinear weight updates due to Hebbian factor leads to increasing discrimination between high reward probability options in the  $G$  actor and between low reward probability options in the  $N$  actor. For intermediate dopamine states ( $G$  and  $N$  actors are balanced), there is equally sensitive to differences in reward probability across the range of rich and lean environments. For high dopamine states ( $\beta_g > \beta_n$ ), the action policy emphasizes differences in benefits (as represented in the  $D1/'G'$  weights), whereas in low dopamine states ( $\beta_g < \beta_n$ ), the action policy emphasizes differences in costs (as represented in the  $D2/'N'$  weights).

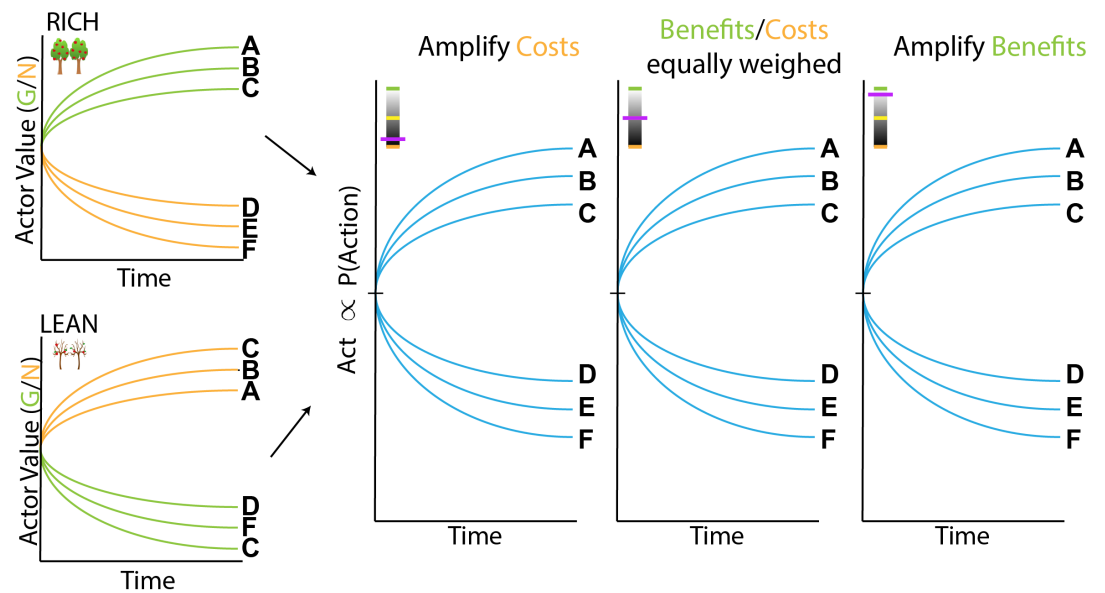

(b) Schematic of OpAL dynamics without three-factor Hebbian term. Removing nonlinear term in OpAL confers redundancy in  $G/N$  weights, which are anticorrelated and thus cannot be leveraged to promote specialization in different ranges.

**Figure 1.** Changes in dopaminergic state (represented by the purple indicators) affect the policy of OpAL due to its nonlinear and opponent dynamics. OpAL\* hypothesizes that modulating dopaminergic state by environmental richness is a normative mechanism for flexible weighting of these representations.

$$Y \sim \text{Beta}(\alpha_i^{\text{state}}, \rho_i^{\text{state}}) \quad (15)$$

$$S = \begin{cases} 1 & \text{if } E[Y] - \phi \text{ std}(Y) > .5 \\ 1 & \text{if } E[Y] + \phi \text{ std}(Y) < .5 \\ 0 & \text{otherwise} \end{cases} \quad (16)$$

$$\rho_i = S(E[Y] - .5)k, \quad k \geq 0 \quad (17)$$

204 **Choice** To accommodate varying levels of  $k$  and to maintain biological plausibility, the contri-  
 205 bution of each actor is lower-bounded by zero – that is,  $G$  and  $N$  actors can be suppressed but  
 206 cannot be inverted (firing rates cannot go below zero), while still allowing graded amplification of  
 207 the other subpopulation.

$$Act_i(a) = \beta_g G_i(a) - \beta_n N_i(a) \quad (18)$$

$$\beta_g = \beta \max(0, 1 + \rho_i) \quad (19)$$

$$\beta_n = \beta \max(0, 1 - \rho_i) \quad (20)$$

208 **Normalization and annealing** The original three-factor Hebbian rule presented in *Collins and*  
 209 *Frank (2014)* approximates the learning dynamics in the neural circuit models needed to capture  
 210 the associated data and also confers flexibility as described above. However, it is also susceptible  
 211 to instabilities under particular circumstances, as highlighted by *Möller and Bogacz (2019)*. Specifi-  
 212 cally, because weight updating scales with the  $G$  and  $N$  values themselves, one can engineer a se-  
 213 ries of outcomes that can cause the weights to decay rapidly toward 0 (see Appendix). To address  
 214 this issue, OpAL\* introduces two additional modifications based on both functional and biological  
 215 considerations. Firstly, we apply a transformation to the actor prediction errors such that they  
 216 are normalized by the range of available reward values (see *Tobler et al. (2005)* for evidence of  
 217 such normalization in dopaminergic signals). Secondly, the actor learning rate is annealed across  
 218 time (see *Franklin and Frank (2015)* for a plausible circuit mechanism allowing striatal learning to  
 219 stabilize across time, while remaining flexible to change points). These modifications improve the  
 220 robustness of OpAL\* and ensure that the actor weights are well-behaved, while preserving the key  
 221 Hebbian features of OpAL (which, as shown below, are needed for its normative advantages). For  
 222 a full discussion on these modifications, see Appendix.

$$G_{t+1}(a) = G_t(a) + \alpha(t)G_t(a)f(\delta_t) \quad (21)$$

$$N_{t+1}(a) = N_t(a) + \alpha(t)N_t(a)f(-\delta_t) \quad (22)$$

$$\alpha(t) = \frac{\alpha}{1 + t/T} \quad (23)$$

$$f(x) = \frac{\delta_t}{R_{mag} - L_{mag}} \quad (24)$$

## 223 Results

### 224 Robust advantages of adaptively modulated dopamine states

225 We hypothesized that OpAL\* confers adaptive flexibility especially when an agent does not have  
 226 information about the statistics of a novel environment and thus the agent cannot choose its hy-  
 227 perparameters accordingly. In this section, we therefore characterize the robustness of OpAL\* ad-  
 228 vantages across a large range of parameter settings. We then explore how such advantages scale

ergic states were a result of dopamine modulation rather than an ineffective use of the critic (e.g., waiting too few trials) or a suboptimal critic (e.g., poorly tuned learning rate).

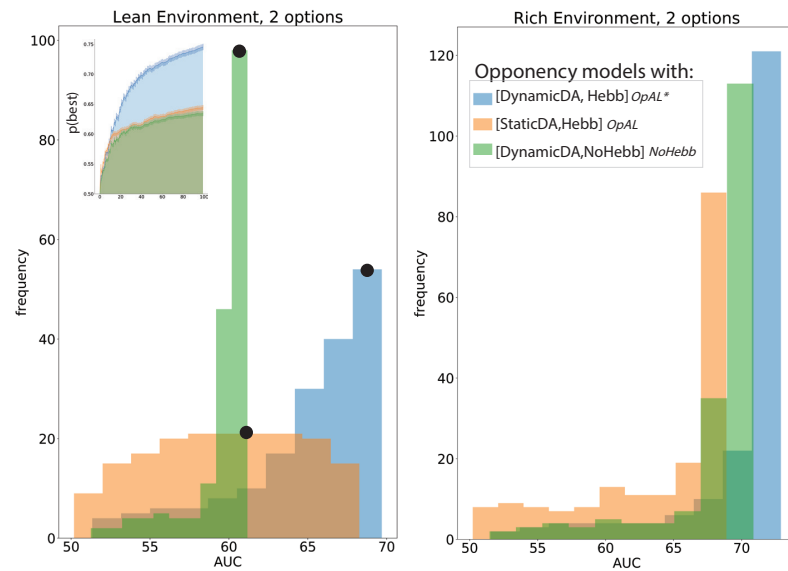

**Figure 2.** Biological mechanisms incorporated in *OpAL\** support robust advantages over control models across parameter settings in a reward rich environment (80% vs 70% two-armed bandit) and a lean, sparse reward environment (30% vs 20% two-armed bandit). Advantages over balanced *OpAL* model indicate need for dynamic dopamine modulation. Advantages over No Hebb model indicate the need for the nonlinear three-factor Hebbian rule (found in Equations 21 and 22). Together, advantages over both control models also indicate need for opponency, particularly given redundancy in G and N weights in the NoHebb model (see text, Figs 1 and 6, and additional comparisons to Q learner below). Figure shows area-under-the-curve (AUC) histograms of average learning curves for all parameters in a grid sweep. Black dots (left figure) indicate example AUC values which correspond to the shaded region under the respective learning curve (average softmax probability of selecting the best option, 30%) for each respective model. See [Parameter grid search](#) for more details.



229 with complexity in environments with increasing number of choice alternatives. In the subsequent  
230 section, we illustrate the mechanisms of such effects.

231 To specifically assess the benefit of adaptive dopaminergic state modulation, we first consid-  
232 ered rich (80% vs. 70%) and lean (30% vs. 20%) 2-armed bandit environments. We compared  
233 OpAL\* to two control models to establish the utility of the adaptive dopamine modulation (which  
234 was not a feature of the original OpAL model), and to test its dependence on nonlinear Hebbian up-  
235 dates. More specifically, the OpAL model equally weights benefits and costs throughout learning  
236 (" $\rho = 0$ "); as such, any OpAL\* improvement would indicate an advantage for dynamic dopaminergic  
237 modulation.<sup>3</sup> The No Hebb model reinstates the dynamic dopaminergic modulation but omits the  
238 Hebbian term in the three factor learning rule (Equations 21, 22). This model therefore serves as  
239 a test as to whether any OpAL\* improvements depend on the underlying nonlinear actor weights  
240 produced by the three-factor Hebbian rule. The No Hebb model also serves to compare OpAL\*  
241 to more standard single-actor RL models; removable of the Hebbian term renders each actor re-  
242 dundant, effectively a single-actor model (See Section Mechanism for more detail). Improvement  
243 of OpAL\* relative to the No Hebb model would therefore suggest an advantage of OpAL\* over  
244 standard actor-critic models (we also test OpAL\* against a standard Q-learner below). Importantly,  
245 models were equated for computational complexity, with modulation hyperparameters ( $\phi$  and  $k$ )  
246 of dynamic DA models (OpAL\* and No Hebb) held constant (see Methods).

247 Following an initial comparison in the simplest two choice learning situation, we tested whether  
248 OpAL\* advantages may be further amplified in more complex environments with multiple choice  
249 alternatives. We introduced additional complexity into the task by adding varying numbers of alter-  
250 native suboptimal actions (e.g., an environment with four actions with probability of reward 80%,  
251 70%, 70%, and 70%). Results were similar for average learning curves and average reward curves;  
252 we focus on average learning curves as they are a more refined, asymptotically sound measure of  
253 normative behavior.

254 We begin with the results of the two-choice paradigm (80%/70% or 30%/20%). For each param-  
255 eter combination, we calculated the area under the curve (AUC) of the learning curves and then  
256 plotted histograms of these AUCs across all parameter sets (Figure 2). The first result that is appar-  
257 ent is that OpAL\* outperforms its balanced OpAL control ( $\rho = 0$ ) especially in the lean (sparse re-  
258 ward) environment. The mean of the OpAL\* distribution is shifted higher and the shape is skewed  
259 rightward, due to selective improvement of moderate performing models (Figure 3a). The improve-  
260 ment is less dramatic in the rich environment, but is still evident and the distributions are more  
261 condensed around the peak, indicating robustness. Moreover, note that these improvements over  
262 balanced OpAL provide a lower bound estimate on the advantages of adaptive modulation, given  
263 that using any other fixed  $\rho \neq 0$  would perform worse across environments: models with  $\rho > 0$   
264 perform very poorly in lean environments and those with  $\rho < 0$  perform very poorly in rich envi-  
265 ronments (see Appendix). Finally, the non-Hebbian model performs dramatically worse in the lean  
266 environment in comparison to both OpAL\* and the OpAL model, suggesting that OpAL\* advan-  
267 tages require nonlinear Hebbian updates. Furthermore, we see here that OpAL\* outperforms the  
268 best performing control within each environment alone.

269 Overall, these results show an advantage for dynamic dopaminergic states as formulated in  
270 OpAL\* when reward statistics of the environment are unknown. This advantage is particularly  
271 prominent in the lean (sparse reward) environment, which is computationally more challenging  
272 and ecologically more realistic than the rich environment. Crucially, dynamic dopaminergic state  
273 leverages the full potential of opponency ONLY when combined with three-factor Hebbian learning  
274 rules, as demonstrated by OpAL\*'s advantage over the No Hebb model.

275 To statistically investigate where dopaminergic modulation was most advantageous, we per-

<sup>3</sup>In our simulations, the OpAL model includes the annealing and normalization additions as discussed in Section OpAL\*. While these features were not present in the original version presented in *Collins and Frank (2014)*, we found they are necessary to address pathological behavior as discussed in Section OpAL\* and in the Appendix. The crucial distinction we emphasize between OpAL and OpAL\* is the non-dynamic versus dynamic adaptation of DA, respectively.

## DYNAMIC DA CONTRIBUTIONS

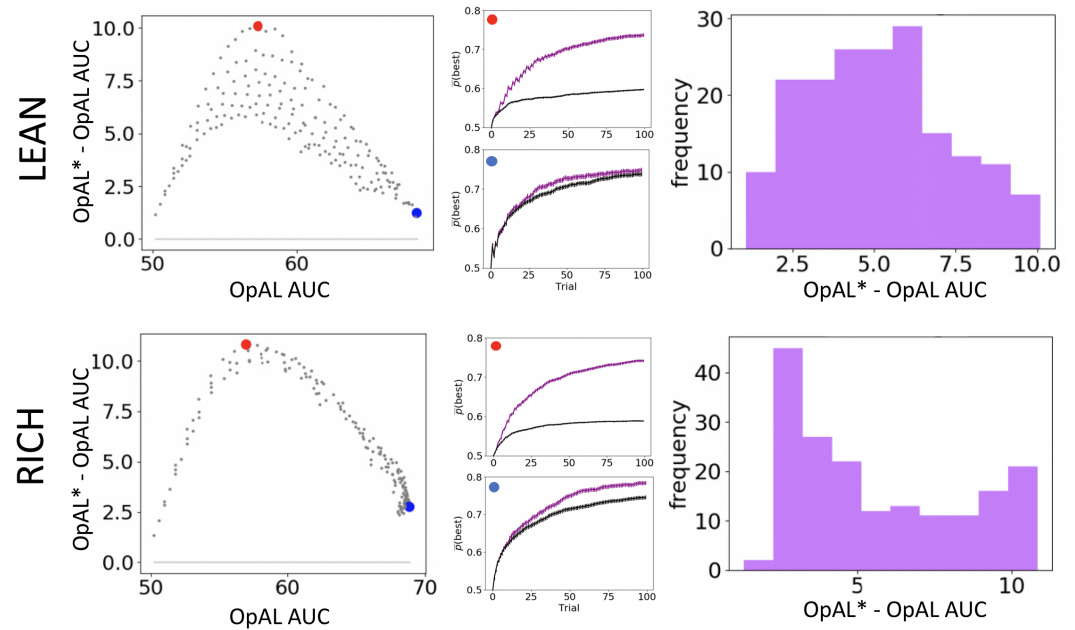

(a) OpAL\* improves upon a control model which lacks dynamic modulation (OpAL,  $\rho = 0$ ), with largest improvement for moderately performing parameters. Left, Each point represents a single parameter combination and its difference in learning curve AUCs in OpAL\* compared to the OpAL model. Center, average learning curves of the parameter setting which demonstrates the best improvement of OpAL\* over the OpAL model (indicated by the red dot) and the parameter setting with the best OpAL model performance (indicated by the blue dot). Right, Histogram of the difference in average learning curve AUCs of the two models with equated parameters. All results also correspond to Figure 2.

## HEBBIAN CONTRIBUTIONS

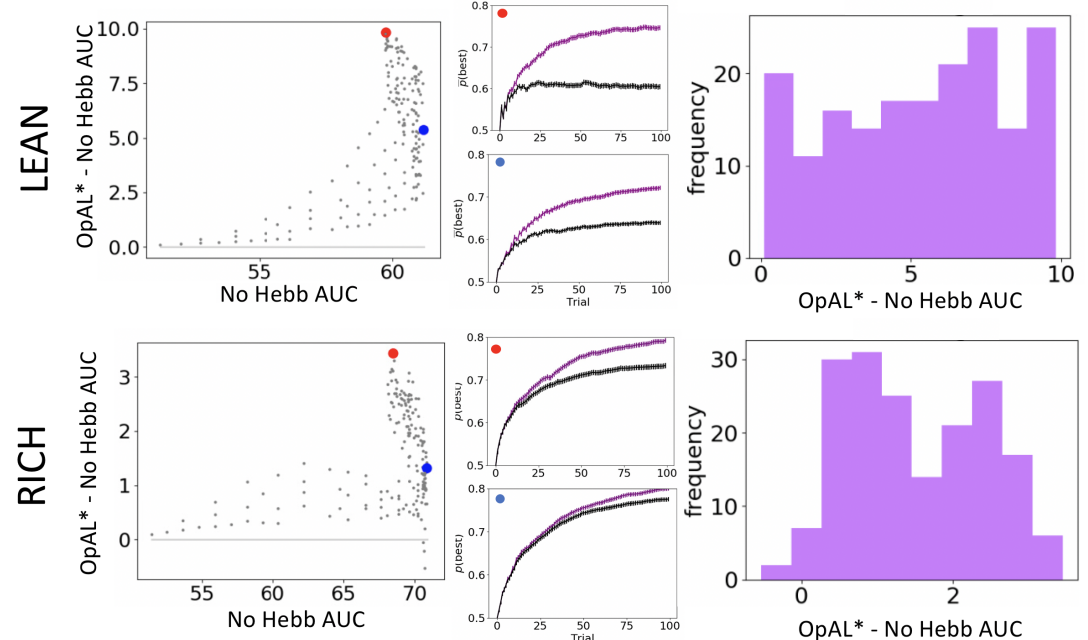

(b) Dynamic DA modulation is insufficient to induce performance advantage without three-factor Hebbian learning (No Hebb). Comparison descriptions analogous to the above. All results also correspond to Figure 2.

**Figure 3.** Parameter level comparison of OpAL\* to a OpAL model and OpAL\* to the No Hebb model across a range of plausible parameters. Results of two-armed bandit environments – rich (80% vs. 70%) or lean (30% vs. 20%) – for 100 trials. See Parameter grid search for further details of methods.

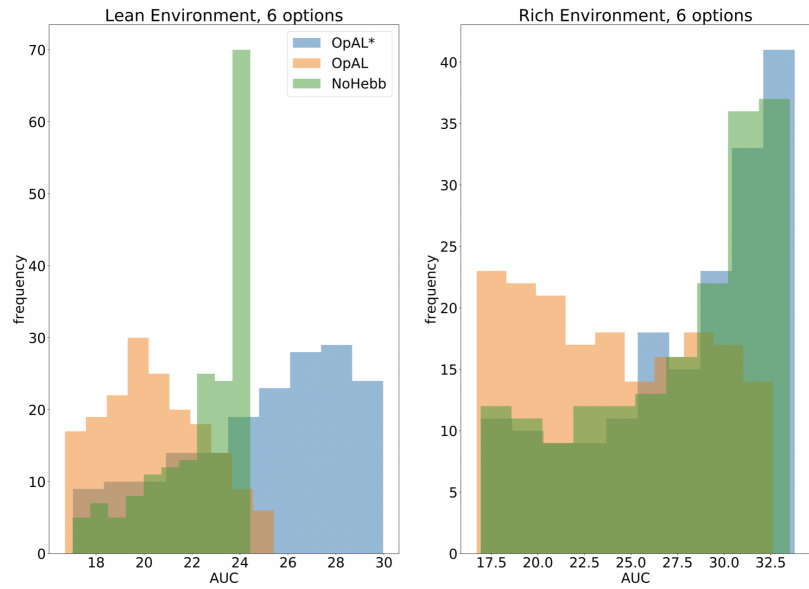

(a) AUC Histogram of average learning curve for various parameter settings in high complexity.

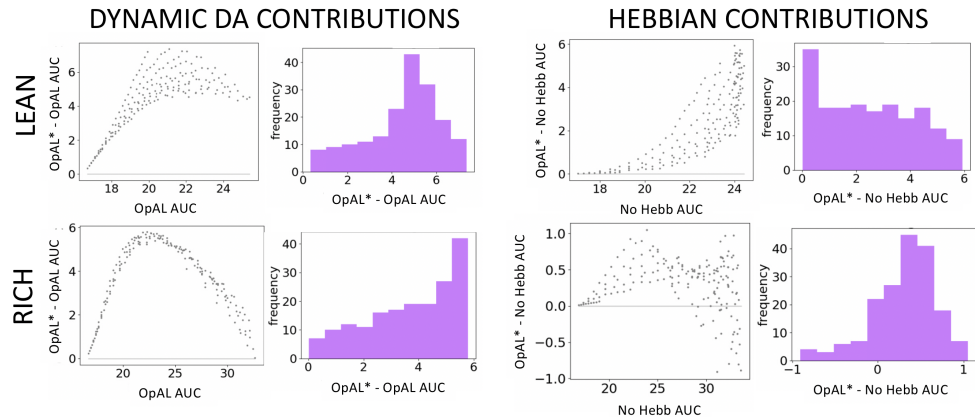

(b) Parameter level comparison of OpAL\* to control models in high complexity.

**Figure 4.** OpAL\* robustly outperforms control models in high complexity environments, with lean environments showing the greatest advantage. Models completed a 6-armed bandit task (with only one optimal action) for 100 trials. See [Parameter grid search](#) for detailed analysis methods.

276 formed one sample t-tests where the null was zero on the difference between the AUC of OpAL\*  
 277 and each control model for every parameter combination over several time horizons (50, 100, 250,  
 278 and 500 trial; see Appendix for details). OpAL\* outperformed its OpAL ( $\rho = 0$ ) control and the non-  
 279 Hebbian version across all time horizons ( $p's < 1.0e^{-47}$ ). We can visualize these statistics plotted  
 280 according to the AUC of the control model as well as the frequency of the AUC differences (Figure 3).  
 281 Interestingly, OpAL\* advantages over the OpAL model show an inverted-U relationship, whereby  
 282 improvements are most prominent for mid-performing parameter combinations. In contrast, im-  
 283 provements relative to the No Hebb model (Figure 3b) are most prominent for high performing  
 284 baseline parameter combinations.

### 285 **OpAL\* advantages grow with environmental complexity**

286 We next explored these effects in progressively more complex environments by increasing the  
 287 number of available choice alternatives, across several time horizons (50, 100, 250, and 500 trials).  
 288 Each complexity level introduced an additional suboptimal action to the rich or lean environment.  
 289 For example, a complexity level of 4 for the lean environment consisted of four options: a higher

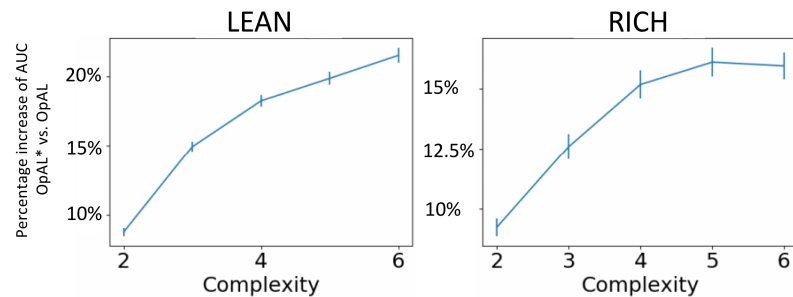

**Figure 5.** Advantage of dynamic dopaminergic modulation of OpAL\* grows with complexity. Complexity corresponds to the number of bandits available in the environment (e.g. a 2-armed bandit, which data point corresponds to Figures 2 and 3, or a 6-armed bandit, which data point corresponds to Figure 4). Values reported are the average percentage increase of OpAL\* learning curve AUC when compared to a OpAL model with equated parameters. That is, we computed the difference in AUC of OpAL\* and OpAL model learning curves for a fixed parameter normalized by the AUC of the balanced OpAL model. We then averaged this percentage increase over all parameters in the grid search. Results are shown for 100 trials of learning.

290 rewarding option (30% probability of reward) and three equivalent lower rewarding options (20%  
291 probability of reward each).

292 OpAL\* outperformed the OpAL model (differences in AUCs,  $p$ 's  $< 2.0e^{-60}$ ) across all time hori-  
293 zons and complexity levels. OpAL\* also outperformed the non-Hebbian version ( $p$ 's  $< 1.0e^{-4}$ ), ex-  
294 cept for the highest complexity rich environments (5 or 6 options) after 500 trials ( $p$ 's  $> 0.1$ ; OpAL\*  
295 advantages were still significant for lower trial counts).

296 We can again visualize these results as AUC histograms for each model (Figure 4a) and as the  
297 AUC differences between matched parameters (Figure 4b). We visualize the highest complexity  
298 here for simplicity. As in the two-option results, the benefits of OpAL\* are most evident in the  
299 lean environment (Figure 4a, left). OpAL\* shows better performance across a range of parameters  
300 than control models. OpAL\* is also the only model to achieve roughly equivalent performance in  
301 rich and lean environments in this parameter range. As noted in the introduction, standard RL  
302 models typically suffer in lean environments due to greater demands on exploration (see below  
303 for comparisons to more traditional RL models); these simulations show that OpAL\* overcomes  
304 this robustness limitation and that its control models do not. OpAL\* also shows less prominent,  
305 but nevertheless significant, advantages in the rich environment compared to the No-Hebb variant  
306 (Figure 4a, right), which can be visualized by the histogram of AUC differences between matched  
307 parameters (Figure 4b, bottom right). In lean environments, OpAL\* improvements over the OpAL  
308 model were most evident for high performing parameter sets (positive trend in the scatter plot).

309 Finally, to assess the advantage of dynamic dopamine modulation, we quantified the OpAL\*  
310 improvement over the balanced OpAL model as a function of complexity levels. Notably, OpAL\*  
311 advantages grows monotonically with complexity, roughly doubling from low to high complexity  
312 levels (Figure 5).

### 313 Mechanism

314 How does OpAL\* confer such an advantage across environments? To illustrate the mechanism  
315 underlying this improvement, we considered two inter-related issues. The first issue concerns the  
316 dynamic leveraging of the nonlinearity in actor weights, and the second addresses the way in which  
317 the opponent mechanism navigates a particularly pernicious exploration/exploitation tradeoff that  
318 arises in lean environments.

319 To observe the impact of nonlinearity, we plotted how *Act* values change as a function of reward  
320 probability and for different DA levels (represented as different colors, Figure 6a). While *Act* values  
321 increase monotonically with reward probability, the convexity in the underlying *G* and *N* weights  
322 (Fig 1a) gives rise to stronger *Act* discrimination between more rewarding options (e.g., 80% vs 70%)

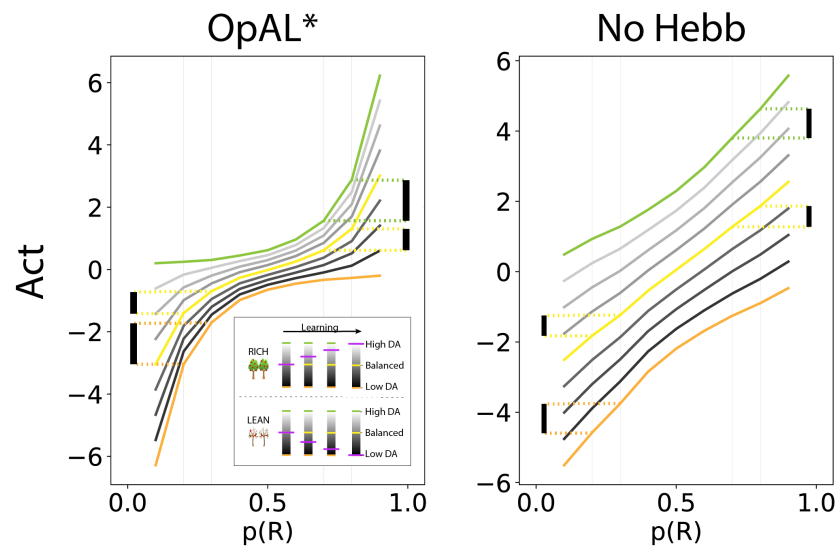

**(a)** OpAL\* capitalizes on convexity in actor weights in different environments. Left, Nonlinearity in OpAL\* update rule induces convexity in  $Act$  values as a function of reward probability (due to stronger contributions of  $G$  weights with higher rewards, and stronger contributions of  $N$  weights with sparse reward). OpAL\* dynamically adjusts its dopaminergic state over the course of learning as a function of its estimate of environmental richness (indicated by elongated, purple bars), allowing it to traverse different  $Act$  curves (high DA in green emphasises the  $G$  actor, low DA in orange emphasises the  $N$  actor). As such, OpAL\* can differentially leverage convexity in  $G$  or  $N$  weights, outperforming a "balanced" OpAL model (in yellow) which equally weighs the two actors (due to static DA). Vertical bars show discrimination between 80% and 70% actions is enhanced with high dopamine state, whereas discriminations between 20% and 30% actions is amplified for low dopamine. Right, Due to redundancy in the No Hebb representations, policies are largely invariant to dopaminergic modulation during the course of learning.  $Act$  values are generated by presenting each model with a bandit using a fixed reward probability for 100 trials; curves are averaged over 5000 simulations.

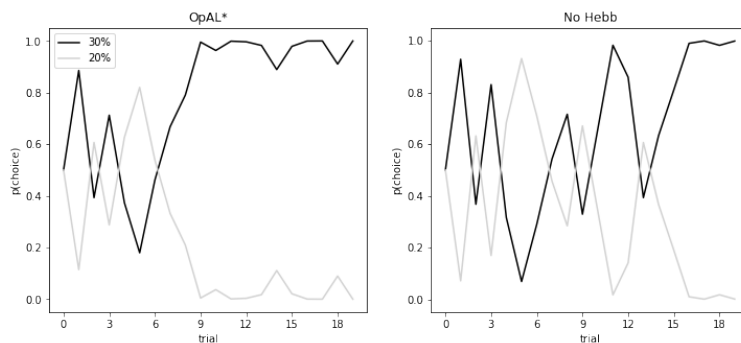

**(b)** Linear weight updating (without Hebbian term) induces prolonged policy fluctuations in lean environments, which (after initial exploration) is overcome by OpAL\*. See main text for explanation. Example curves from optimized parameters from Figure 7 using same random seeds across models.

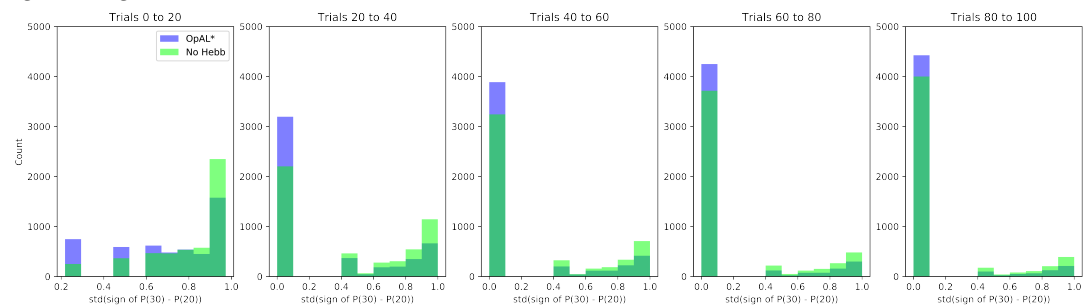

**(c)** OpAL\* demonstrates reduced policy fluctuations in early learning in sparse reward environments, as indexed by the sign of the difference between the probability of selecting the optimal action (30%) and the suboptimal action (20%). Higher standard deviation of this metric indicates more fluctuations in policy. Here we show the histogram of standard deviations of these signs across 5000 simulations (which correspond to Figure 7), illustrating higher exploration rates in the No Hebb model.

**Figure 6.** Overview of OpAL\* mechanisms contributing to performance improvement relative to balanced OpAL and No Hebb variants.

323 with higher dopamine levels, and between less rewarding options (e.g., 30% vs 20%) with lower  
324 dopamine levels. As the critic converges on an estimate of environmental richness, OpAL\* can  
325 adapt its policy to dynamically emphasize the most discriminative actor (Figure 6a, left). In contrast,  
326 due to the lack of nonlinearity, the No Hebb variant induces redundancy in the  $G$  and  $N$  weights and  
327 thus essentially reduces to a standard actor-critic agent. As such, dopamine modulation does not  
328 change its discrimination performance across environments (Figure 6a, right).

329 If enhancing discrimination between action values improves performance, why could this not  
330 be achieved by simply increasing overall exploitation (e.g., softmax gain)? Note that the smooth  
331  $Act$  curves discussed above depend on agents having already been exposed to reward probabilities  
332 (i.e., they were generated after learning). But as highlighted in the introduction, sparse reward envi-  
333 ronments typically require higher levels of exploration to accurately estimate action values. Indeed,  
334 in lean environments, repeated selection of the optimal action often leads to its value decreasing  
335 below that of suboptimal actions during early learning, causing the agent to switch to those subop-  
336 timal actions again until they become worse, and so on. This effect is evident in the No Hebb model,  
337 which is susceptible to substantial fluctuations in its policy in lean environments (Figures 6b and  
338 6c). OpAL\* overcomes this issue in two ways. First, opponency allows the non-dominant (here,  $G$ )  
339 actor to contribute early during learning (before  $N$  weights accumulate), thereby flattening initial  
340 discrimination and enhancing exploration. Second, the Hebbian nonlinearity ensures that nega-  
341 tive experiences induce disproportional distortions in  $N$  weights for the most suboptimal actions  
342 after they have been explored (Figure 6a), thereby allowing the agent to more robustly avoid them  
343 (Figures 6b and 6c). By adapting its policy by environmental richness, OpAL\* can dynamically lever-  
344 age this specialization. In sum, OpAL\* maintains specialized representations but can dynamically  
345 modulate when to use them to solve an explore-exploit tradeoff that is especially predominant in  
346 lean environments.

347 We conclude this section by considering whether the above discussion implies OpAL\* might  
348 simply induce a more efficient change from exploration to exploitation across learning, as is some-  
349 times considered in variants of standard RL. To diagnose whether dynamically modifying the soft-  
350 max temperature alone is sufficient to improve robustness, we simulated a control variant in which  
351 both  $G$  and  $N$  were dynamically increased together, independent of the sign of  $\rho$  (Modulation model,  
352 see Appendix). Importantly, OpAL\* outperformed the best-performing Modulation model across  
353 environments, and demonstrated notable improvement in lean environments. These simulations  
354 show that while dynamic changes in softmax temperature may be sufficient to improve perfor-  
355 mance in rich environments, the dynamic shift from one actor to another is integral to flexibility  
356 across both environments and especially for addressing the limitations of single actor models in  
357 lean environments. It is plausible that combining approaches (dynamic changes in both  $\beta$  modula-  
358 tion and  $\rho$  modulation) would show additional improvement. However, our focus is to investigate  
359 why dopaminergic modulation may be normatively useful and therefore such investigation is be-  
360 yond the scope of this paper.

### 361 **OpAL\* outperforms alternative models with optimized parameters**

362 The above simulations highlighted robustness of OpAL\* advantages across large ranges of parame-  
363 ters using comparison models that are identical in every other respect. We next set out to compare  
364 OpAL\* performance to other alternatives in the literature. For example, while the non-Hebbian  
365 model was the best control given every other aspect of it was identical to OpAL\*, it still comprises  
366 an actor-critic. Any claims that OpAL\* confers an advantage should also be compared to the most  
367 common model-free RL agent, a Q-learner, which also maintains a single expected value across  
368 options. We also compared OpAL\* to an alternative model of D1/D2 opponency *Möller and Bo-*  
369 *gacz (2019)*. Given that we are now comparing models of different forms altogether, we optimized  
370 parameters in each case using gradient descent, thereby allowing each model to exhibit its best  
371 possible performance. Importantly, to equate degrees of freedom between OpAL and a standard  
372 Q-learner, DA modulation ( $\phi$ ,  $k$ ) and annealing ( $T$ ) parameters of OpAL\* variants were held constant

373 during optimization procedures (see Methods).

374 To begin, we considered a standard Q learner by optimizing its learning rate and softmax tem-  
375 peratures, and optimized OpAL\* over these same parameters, with both models tested across  
376 reward rich (80% vs. 70%) and lean (30% vs. 20%) 2-armed bandit environments (Figure 7). Be-  
377 cause dopaminergic modulation may be most useful when the environment reward statistics are  
378 unknown, we optimized the parameters across *both* environments rather than optimized for each  
379 environment individually.

380 We first confirmed that OpAL\* exhibits performance improvements over the Q learner in re-  
381 ward lean environments, and exhibits comparable performance in reward rich environments (see  
382 also *Collins and Frank (2014)*). Note that because only the learning rate and softmax temperature  
383 were optimized in OpAL\*<sup>4</sup>, these simulations provide a lower bound on the potential improvement  
384 for OpAL\*.

385 To more specifically assess the benefit of adaptive dopaminergic modulation, we further com-  
386 pared OpAL\* to three additional control models, where each model had its parameters optimized.  
387 The first model is an alternative to OpAL (but still opponent G/N model) proposed by *Möller and*  
388 *Bogacz (2019)*. This model does not include the Hebbian term, but does include a different non-  
389 linearity which (under some constraints) allows the *G* and *N* weights to converge to the mean  
390 expected payoffs and costs in the environment. This normative property serves as a useful com-  
391 parison: once costs and benefits are known, an agent should be able to choose its policy to maxi-  
392 mize reward. However, in actuality, the convergence to expected payoffs and costs in this model  
393 depends on having a constrained relationship between parameters optimized by *a priori* access to  
394 the distributions of rewards in the environment. Thus we hypothesized that OpAL\* could more ro-  
395 bustly optimize performance across environments with unknown statistics. Moreover, this control  
396 model serves as another test for the utility of the Hebbian term and the convexity of OpAL\* G/N  
397 weights, as compared to the concave weights in *Möller and Bogacz (2019)*. For completeness, we  
398 also include the other two OpAL control models from the previous section: the "balanced" ( $\rho = 0$ )  
399 OpAL model which lacks dynamic DA and the "No Hebb" OpAL model which omits the Hebbian  
400 term in the weight update. Because of the redundancy in *G / N* weights, the non-Hebbian model  
401 also serves as another baseline comparison for standard RL models, like Q learning, but with all  
402 other aspects of the model equated.

403 OpAL\* outperformed all control models when each of them were optimized (Figure 7). Rela-  
404 tive to the OpAL model, OpAL\* adaptively modulated its choice policy to increase dopamine levels  
405 ( $\rho > 0$ ) in rich environments, but to decrease dopamine levels ( $\rho < 0$ ) in lean environments (See  
406 Figure 6a.) Indeed, performance advantages are especially apparent in reward lean environments,  
407 providing a computational advantage for low dopamine levels that can accentuate differences be-  
408 tween sparsely rewarded options. Notably, performance advantages in lean environments de-  
409 pended on the Hebbian term. While other models (including "standard" RL) make qualitative pre-  
410 dictions that performance should be significantly lower for lean than rich environments, OpAL\*  
411 shows substantially improved performance in lean environments. In line with these qualitative  
412 patterns of OpAL\*, rodents showed equally robust learning in rich environments (90% vs. 50 %  
413 bandit task) compared to lean environments (50% vs. 10% bandit task) *Hamid et al. (2015)* (see  
414 Figure 1d of that paper).

415 Finally, the model in *Möller and Bogacz (2019)* demonstrated poor across-environment perfor-  
416 mance, performing only slightly above chance in the rich environment. Results are not shown for  
417 this model as it was not intended to be optimized across diverse environments. (Indeed, as noted  
418 above, it can perform quite well in any given environment if its parameters are chosen carefully,  
419 *Möller and Bogacz (2019)*). We further compared a grid search for the *Möller and Bogacz (2019)*  
420 model and again found a detriment in performance relative to OpAL\*, with sensitivity to small de-  
421 viations from its optimal parameter settings in a particular environment. This sensitivity worsened

<sup>4</sup>Other parameters were only moderately hand-tuned for reasonable performance. Optimizing only the learning rate and softmax temperature for both models ensured that the searched parameter space for the models was well-matched.

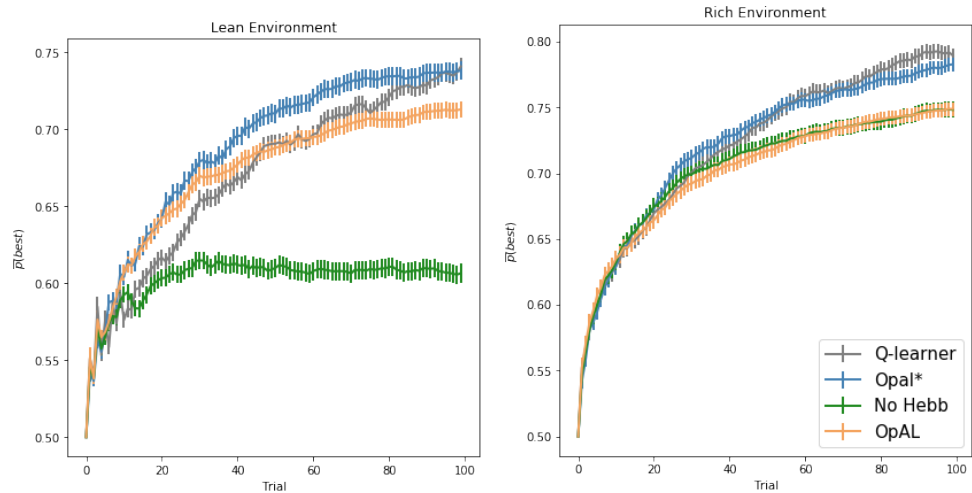

**Figure 7.** Comparison of OpAL\* and various control models, each optimized for performance across rich and lean environments. Each curve is the mean softmax probability of selecting the best action over 5,000 simulations using the optimized parameters. Error bars are standard error of the mean. See Section Optimized Models in Materials and Methods for details on parameters and optimization procedure.

422 with complexity, and the model significantly underperformed relative to OpAL\* across both envi-  
 423 ronments. Thus, opponency itself is insufficient to capture the proposed advantages of OpAL\*.

#### 424 **OpAL\* adaptively modulates risk taking**

425 Although the above analyses focused on learning effects, the adaptive advantages conferred by  
 426 dopaminergic contribution were mediated by changes in the choice function (weighting of learned  
 427 benefits vs costs), rather than learning parameters *per se*. We thus next sought to examine whether  
 428 the same adaptive mechanism could also be leveraged for inferring when it is advantageous to  
 429 make risky choices.

430 Models selected between a sure reward and a gamble of twice the value with unknown but  
 431 stationary probability. The sure thing (ST) was considered the default reference point (*Kahneman*  
 432 *and Tversky, 1979*), and gamble reward was encoded relative to that; that is,  $R_{\text{mag}} = +1$  if gamble  
 433 was won (gamble received an additional point relative to taking ST) or  $L_{\text{mag}} = -1$  (loss of the ST). In  
 434 high probability gamble states, the probability of reward was drawn uniformly above 50%; in low  
 435 probability gamble states, probability of reward was drawn uniformly below 50%. Models were pre-  
 436 sented with the same gamble for 40 trials. The critic tracked the  $\hat{p}(r)$  of the gamble and modulated  
 437  $\rho$  by its estimated expected value, as in Equations 15 through 17. G/N actors then tracked the ac-  
 438 tion value of selecting the gamble. The probability of accepting the gamble was selected using the  
 439 softmax choice function, such that accepting the gamble is more likely as the benefits (G) exceed  
 440 the costs (N). *Act* definition can be found in Equation 18.

$$p(\text{gamble}) = \frac{1}{1 + e^{-Act(a)}}$$

441 As expected, OpAL\* dynamically updated its probability of gambling and improved performance  
 442 in comparison to the balanced OpAL, non-modulated model (Figure 8). In states with high prob-  
 443 ability ( $> 50\%$ ), value modulation helped the model infer that the gamble was advantageous. In  
 444 low probability gambles ( $< 50\%$ ), value modulation aided in avoiding the gamble, which was unfa-  
 445 vorable in the limit. Similar results were also obtained using a simpler (non-Bayesian) critic which  
 446 learned only through a TD update rule.



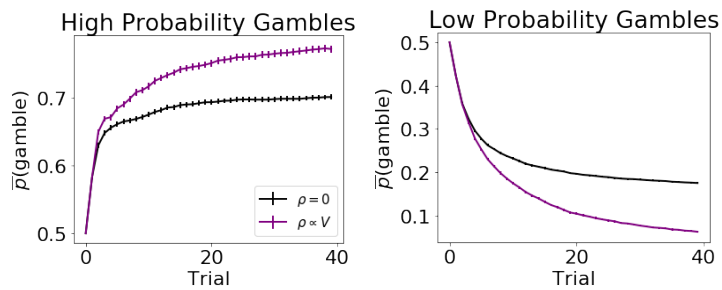

**Figure 8.** Dynamic dopamine modulation by estimated reward probability helps OpAL\* decide when it is beneficial to gamble or to accept a sure reward.  $\alpha_a = 1.0$ ,  $\beta = 1.5$ , annealing parameter  $T = 10$ , and modulation parameters  $k = 20$  and  $\phi = 0$ . Results were averaged over 5,000 simulated states. Error bars are standard error of the mean. To limit variance, paired OpAL\* and OpAL models were again given the same initial random seed.

### OpAL\* captures alterations in risky choice patterns across species

While all analyses thus far focused on normative advantages, the OpAL\* model was motivated by biological data regarding the role of dopamine in modulating striatal contributions to cost/benefit decision making. We thus sought to examine whether empirical effects of DA and environmental richness on risky choice could be captured by OpAL\* and thereby viewed as a byproduct of an adaptive mechanism. We focused on qualitative phenomena in empirical data sets that are diagnostic of OpAL\* properties (and which should not be overly specific to parameter settings) and that could not be explained individually or holistically by other models. In particular, we consider impacts of optogenetic and drug manipulations of dopamine and striatal circuitry in rodents and humans. We further show that OpAL\* can capture economic choice patterns involving manipulation of environmental reward statistics rather than DA.

### Striatal D2 MSN activity and reward history alters risky choice in rodents

Perhaps the most germane empirical study to OpAL since the original model was developed is that of (Zalocusky *et al.*, 2016), who studied rodent risky choice as it is altered by reward history, dopamine manipulation, and striatal activity. Rats repeatedly chose between a certain option with a small reward or a gamble for larger reward whose expected value matched that of the certain option. Following unsuccessful gambles, they observed increased activity in D2-expressing medium spiny neurons (MSNs) in ventral striatum during subsequent decision periods. Recall that in OpAL\*, reward history alters DA levels which in turn modulate activity in striatal MSNs and accordingly cost/benefit choice. In this case, a reduced recent reward history should reduce striatal DA, elevate D2 MSN activity, and thus promote choices that avoid costs. Indeed, Zalocusky *et al.* observed that animals were more likely to make a "safe" choice when D2 MSNs were stimulated during the choice period, and that endogenously, such safe choices were related to increased D2 activity and enhanced following unfavorable outcomes. Together, these results suggests a trial-to-trial adaptation of choice (rather than learning) driven by changes in D2 activity, akin to OpAL\* mechanisms. Furthermore, such optogenetic stimulation effects were only seen in animals with a baseline preference for risk-seeking; risk-averse animals exhibited no change in behavior with the phasic manipulation.

Note first that these patterns of results are inconsistent with classical models in which striatal D2 activity is related only to motor suppression; here the impact of D2 activity is not to suppress actions altogether but instead to bias choices toward safe options. Instead, these results are consistent with OpAL\* in which D2 activity is related to promoting actions with lowest perceived cost. Indeed, we found that this pattern of results align with the predictions of OpAL\* but not alternative risk-sensitive models (see below).

As in previous sections, we encode gamble outcomes relative to the certain option:  $R_{\text{mag}} = +1$

## Optogenetics and photometry of D2 striatal cells in rodent risky choice

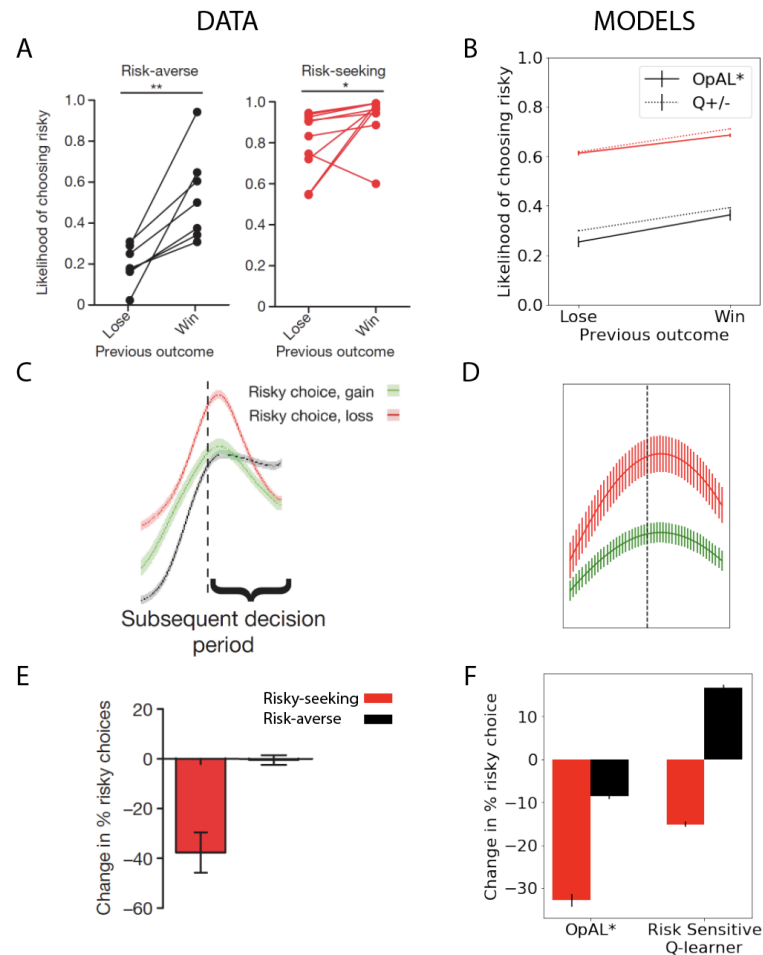

**Figure 9.** Striatal D2 MSN activity and reward history alters risky choice in rodents. Rodents repeatedly selected between a certain option with low magnitude of reward and a gamble with higher payout when successful. Left column: Modified figures from *Zalocusky et al. (2016)*. Right column: Model simulations with OpAL\* and Risk-sensitive RL (RSRL). **A,B.** Both risk-averse and risk-seeking animals are more likely to avoid a gamble after a gamble "loss" (failure to obtain the large reward). Both OpAL\* and RSRL, a standard Q-learner with different learning rates for positive and negative prediction errors, can capture this trend, via changes in either choice function (D1 vs D2 MSN contributions) or learning rates, respectively. **C,D.** D2 MSN activity, measured via photometry, is larger after a gamble loss (red) than a gamble win (green) during the subsequent decision period. This pattern is reproduced in OpAL\*, whereby D2 MSN activity is influenced by the product of the  $N$  weights and the adaptive  $\beta_n$ , which amplifies D2 MSN activity when dopamine levels are low. The simulation peak represents the average of this product after a loss or after a win, which is carried over to subsequent choices; error bars reflect SEM across simulations and dynamics before and after peak were generated by convolving the signal with a sinusoidal kernel for illustrative purposes. **E,F.** Optogenetic stimulation of D2 MSNs during the choice period induces risk-aversion selectively in risk-seeking rats. OpAL\* captures this preferential effect by magnifying the effective D2 MSN activity and inducing avoidance primarily in risk-seeking agents. In contrast, RSRL predicts opposite patterns in risk-seeking and risk-averse animals. Parameters OpAL\*:  $\beta = 1.5, \alpha = 1., T = 20, k = 1.1, \phi = 1.0$ . Baseline  $\rho$  risk-seeking (0.85) and risk-averse (-0.75). Parameters RSRL: Risk-seeking  $\alpha_+ = 0.3, \alpha_- = 0.1$ ; Risk-averse  $\alpha_+ = 0.1, \alpha_- = 0.3, \beta = 1.5$ ). Since optogenetic effects were evident primarily during the choice period, we modeled this by changing the choice function in both models: in OpAL, trial-wise  $\rho$  values were decreased by 1.0 to mimic increased D2 MSN activity / decreased DA. In RSRL the choice function was altered by reducing  $\beta$  (to 0.01), leading to opposite directional effects in risk-seeking and risk-averse agents. Agents selected between a certain option and a 50/50 gamble with twice the payout for 100 trials.

482 if gamble was won or  $L_{\text{mag}} = -1$ . For OpAL\*, the critic and actors operated as in section OpAL\*  
483 adaptively modulates risk taking. G/N actors then tracked the value of selecting the gamble using  
484 the prediction error generated by the critic. As before, the probability of accepting the gamble was  
485 selected using the softmax choice function.

486 To simulate risk-seeking and risk-averse rats, we modified the baseline DA levels ( $\rho$ ), holding all  
487 other parameters constant. Risk-seeking rats were modeled by higher levels of baseline  $\rho$  relative  
488 to those of simulations for risk-averse rats. To model phasic optogenetic stimulation,  $\rho$  values were  
489 decreased by a constant amount from this baseline.

490 We contrasted OpAL\* to alternative models in which risky choice could be adapted. A popular  
491 model of dynamics in risky choice is called "risk-sensitive RL", in which an agent learns at different  
492 rates from positive and negative prediction errors:

$$Q(t+1) = Q(t) + \alpha_+ * PE, \text{ if } PE \geq 0,$$

$$Q(t+1) = Q(t) + \alpha_- * PE, \text{ if } PE < 0$$

493 ,  
494 where actions are selected using softmax function over Q values. If  $\alpha_+ < \alpha_-$ , an agent is more  
495 sensitive to risks in its environment. This formulation has been useful for characterizing asymmet-  
496 ric impacts of dopamine bursts and dips *Frank et al. (2007a)*; *Niv et al. (2012a)*, but focuses on  
497 learning rather than changes in choice functions. Because the effective manipulations on risky  
498 choice were made during the choice period rather than outcome, learning rate manipulations  
499 alone could not capture the effects. However, it is possible that DA or D2 manipulations can affect  
500 choice in simple RL models via simple changes to the overall softmax temperature, as assumed by  
501 many models (*FitzGerald et al., 2015*; *Cinotti et al., 2019*; *Eisenegger et al., 2014*; *Lee et al., 2015*;  
502 *Humphries et al., 2012*). We thus allowed the RSRL model to exhibit changes in risky choice by  
503 manipulating softmax gain accordingly, whereby D2 stimulation would mimic low DA levels and  
504 hence lower gain.

505 We found that both OpAL\* and RSRL accounted for the decrease in gamble choices after gam-  
506 ble losses relative to wins, but generated opposing predictions for decision-period manipulation  
507 of D2-expressing neurons. While OpAL\* predicts a decrease in riskiness in both risk-seeking and  
508 risk-averse rats (but more strongly in risk-seeking rats), RSRL predicts a decrease in riskiness in  
509 risk-seeking rats but an *increase* in riskiness in risk-averse rats. The reason for this effect is simply  
510 that a change in softmax gain leads to reduced exploitation, and thus drives both groups toward  
511 random selection. Thus the pattern of choice data is aligned with OpAL\* but not with RSRL, or  
512 with classical models in which D2 activity inhibits choice altogether. These opposing predictions  
513 result from the *architecture* of OpAL\* inspired by the biology— including opponency, Hebbian learn-  
514 ing, and dynamic DA – rather than specific parameter values. Furthermore, OpAL\* also captures  
515 the predicted relative activation of D2-expressing cells during the choice period following losses,  
516 due to changing DA levels ( $\beta_n(t)$ ) and the learned cost of the gamble ( $N(t)$ ), in line with Zalocusky's  
517 photometry data.

## 518 **DA drug effects on risky decision-making and individual differences therein**

519 We next focus on a human risky decision making paradigm manipulating DA levels (*Rutledge et al.,*  
520 *2015*). Participants were presented with interleaving trials of gain gambles (certain gain vs. po-  
521 tential greater gain or 0), loss gambles (certain loss vs. potential greater loss or 0), and mixed  
522 gambles (certain no reward vs. potential gain or potential loss). All gambles were successful with  
523 50% probability. The study tested the effects of levodopa (L-DOPA), a drug which boosts dopamine  
524 release, on risky decision-making. The main impact of L-DOPA was to selectively amplify gambling  
525 on gain (but not loss or mixed) trials (Figure 10 A, left). This study also found that individual differ-  
526 ences in this impact of drug on gambling correlated with effective drug dosage (Figure 10 B, left).

## DA drug effect on human risky choice

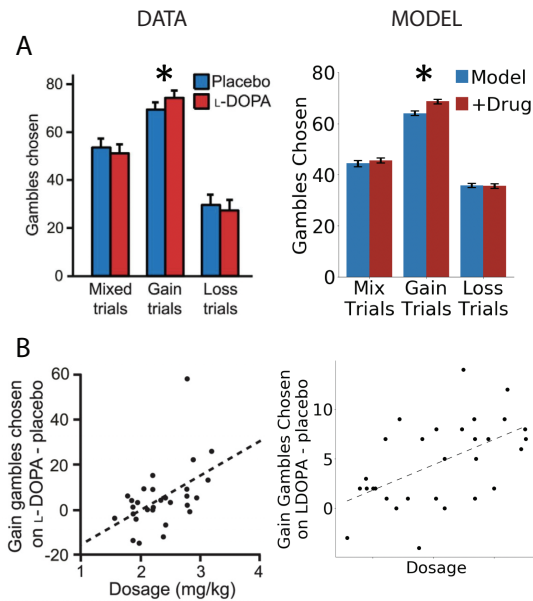

## Environment richness affects human economic choice

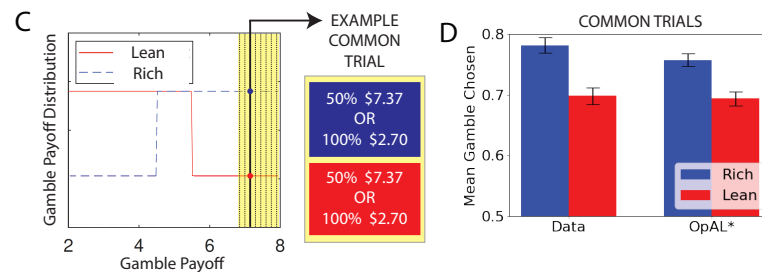

**Figure 10. A,B.** DA drug effects on risky decision-making and individual differences therein. OpAL\* captures behavioral risk patterns of healthy participants on and off L-DOPA, a drug which boosts presynaptic DA. **A.** L-DOPA administration selectively increased risky choice in gain trials, where choice was between a sure reward and a 50% gamble for a larger reward, as compared to loss trials (sure loss vs gamble to avoid loss) or mix trials (in which gambles could result in gains or losses). **B.** These effects were larger for subjects with higher effective drug doses, Spearman's  $\rho = 0.47, p < 0.01$ . Left: Modified figures from *Rutledge et al. (2015)*. Right: OpAL\* simulations reproduce these selective effects. Spearman's  $\rho = .50, p < .01$  To model individual differences in effective drug levels, for each pair of model on and off drug,  $d$  was drawn from a normal distribution centered at .5 with variance .25. Parameters:  $\beta = 1.5, k = 1$ . **C-D.** Risky decisions are sensitive to environmental richness In contrast to other empirical results discussed where dopamine pathways were directly manipulated, *Frydman and Jin (2021)* manipulated reward statistics of the payoffs in the environment, as in our normative simulations. Participants chose between a certain reward and a 50% gamble over two blocks. The distribution of payoffs in each block was either Rich (higher frequency of large magnitudes) or Lean (higher frequency of small magnitudes). Crucially, each block contained predetermined "common trials" where the payoff of both the gamble and certain option were fixed (e.g., an offer 50% \$7.13 vs. 100% \$2.70 was presented in *both* the Rich and Lean block). The key finding was that participants were more likely to gamble on these common trials when presented in the Rich context. OpAL\* reproduces this pattern, due to adaptive  $\rho$  increasing DA levels and risk-tasking in the Rich block. Parameters:  $\alpha = 1., T = 10, \beta = 0.5, \phi = 1.0, k = 0.09$

527 The authors reported that the risk-seeking behavior with DA drugs was best described in terms of  
528 changes in a Pavlovian approach parameter. Here, we wished to see if the mechanisms introduced  
529 above within OpAL\* with endogenous changes in dopaminergic state could replicate the pattern  
530 of results, thereby providing a normative interpretation.

531 We simulated 300 trials (100 gain gambles, 100 loss gambles, and 100 mixed gambles, ran-  
532 domly interleaved, as described in *Rutledge et al. (2015)*). Probability of gambling was determined  
533 as described above in the normative risky choice section, with gambles accepted as the benefits  
534 outweigh the costs relative to the ST.  $G$  and  $N$  actor values were explicitly set on each trial ac-  
535 cording to the instructed gamble and encoded relative to the certain option as in Section OpAL\*  
536 adaptively modulates risk taking. This reduced the free parameters of OpAL\* (no annealing or ac-  
537 tor learning rate needed) while retaining its core features of DA reweighting the contributions of  
538 opponent representations during choice according to context.

539 While values and probabilities were explicitly instructed in the experiment, subjects neverthe-  
540 less experienced the outcomes of each gamble. The OpAL\* model assumes that they thus track the  
541 average value of offers across trials, such that a gain trial would elicit a positive dopamine deflec-  
542 tion, given that its expected value is larger than that for mixed and loss trials. (As the authors note  
543 in discussing their findings, "in this task design, even the worst gain trial is better than the average  
544 trial and so likely inspires dopamine release.") We thus modeled the relative DA-state  $\rho$  propor-  
545 tional to the expected value of the current gamble offer, approximating how "rich" or "lean" the  
546 current offer was relative to all offers in the game.<sup>5</sup> (We formulate  $\rho$  proportional to value here,  
547 to be consistent with simulations in the above sections, but very similar results were obtained in a  
548 separate set of simulations in which  $\rho$  was modulated by RPE).

$$\rho(t) = .5 \times (\text{certain outcome}) + .5 \times EV(\text{gamble}) \quad (25)$$

549 To model L-DOPA, we hypothesized that it would boost positive RPEs via enhancement of evoked  
550 (phasic) DA release, as observed in vivo across species (*Voon et al., 2010; Pessiglione et al., 2006a;*  
551 *Qi et al., 2016; Harun et al., 2016*). We assumed that L-DOPA amplified endogenous phasic re-  
552 lease, which occurs when offers are better than usual (positive RPE). The effect dosage level was  
553 represented by  $d$  when the gamble had a positive value, as shown below.

$$\rho'(t) = \rho(t)(1 + d) \quad (26)$$

$$d \geq 0 \quad (27)$$

554 As hypothesized, OpAL\* captured the selective effects of L-DOPA on gambling in gain trials. It  
555 also captured the overall proportion of gambles chosen for different trial types (Figure 10 A), as  
556 well as the correlation between effective dosage and difference in gambling on and off drug (Figure  
557 10 B).<sup>6</sup> Furthermore, the Pavlovian model presented in *Rutledge et al. (2015)* would predict that  
558 gambling would occur for positive-RPEs even if the potential benefit of the gamble was not as high

<sup>5</sup>As gamble offers were explicit, removing uncertainty in trial richness, we omitted the parameter  $\phi$  which modulated DA levels by degree of certainty in environmental richness, further reducing model complexity. OpAL\*'s ability to capture shifting patterns of risky choice should thus be viewed as a byproduct of interacting opponent, nonlinear, and dynamic DA mechanisms rather than a result of high degrees of freedom.

<sup>6</sup>For clarification, *Rutledge et al. (2015)* highlighted that the drug effects appear "value-independent", whereas here we explicitly are changing risk sensitivity according to the interaction between drug and offer value. It is important to note, however, that their definition of value differs than that used to modulate dopaminergic state in these simulations. In *Rutledge et al. (2015)*, value is defined as the advantage of the gamble, i.e., the difference between the expected value of the gamble and the sure reward. Here, we considered value to be the combined overall value of the offer presented, such that positive RPEs exist when values are greater than expected, and are in turn was modified by drug dosage. It is this component that captures the selective increase in gambling in gain trials. Note that the model does predict that such gambles would be yet more likely when the potential benefit of gambling is larger (i.e., when gains are particularly large) – but that this effect would also be present off drug. It is also possible that the value-independence in *Rutledge et al. (2015)* resulted from a ceiling effect for gambling in higher gain trials.

559 as the sure thing; OpAL\* would only predict increased gambling if the benefits are greater than  
560 the sure thing.

561 Here, we have extended OpAL to account for risky decision-making by dynamically changing  
562 dopamine levels at choice proportional to the value of the current state/gamble offer. This ac-  
563 counted for findings of increase attractiveness of high-value risky options with the administration  
564 of L-DOPA (Figures 10 A). The model also accounted for individual differences of risk due to ef-  
565 fective L-DOPA dosages (Figures 10 B). As highlighted in the previous section, these effects can  
566 normatively be explained as behavioral changes reflecting changes of inferred richness of current  
567 state. These results also suggest that individual differences in risk preference and sensitivity may  
568 be due to learned statistics of the world, casting these individual differences as deriving from an  
569 adaptive mechanism to an animal's or human's experience niche.

### 570 **Risky decisions are sensitive to environmental richness: concordance with effi-** 571 **cient coding models of economic choice**

572 Thus far we have focused on data that are informative about the biological mechanisms (striatal  
573 opponency and DA modulation thereof) by which OpAL\* supports adaptive behavior. But OpAL\*  
574 also makes straightforward economic choice predictions that do not require biological manipula-  
575 tions. In particular, one way of conceptualizing OpAL\* is that it serves as an efficient coding mech-  
576 anism, by amplifying the actor that maximally discriminates between reward values in the current  
577 environment. If choice patterns concord with this scheme, one should be able to manipulate the  
578 environment and influence choice patterns. For example, consider a gamble in which the benefits  
579 outweighs the costs. OpAL\* predicts that decision makers should more consistently opt to take  
580 this gamble when it is presented in the context of a rich environment. Indeed, this is precisely  
581 what was found by economist researchers, who also considered such patterns to be indicative of  
582 efficient coding (*Frydman and Jin, 2021*).

583 In this study, participants were presented with a series of trials where they selected between a  
584 gamble with a varying magnitude  $X$  with 50% probability and a certain option with varying magni-  
585 tude  $C$ . The task featured two conditions, which we refer to as Rich and Lean. The range (minimum  
586 and maximum) of  $X$ 's and  $C$ 's were equated across the two conditions, but high magnitude  $X$ s and  
587  $C$ s were more frequent in the Rich environment, whereas low magnitude  $X$ s and  $C$ s were more fre-  
588 quent in the Lean environment. The distribution of  $C$  was set to  $0.5 * X$  so that the expected value of  
589 the risky lottery and certain option were on average equated. Critically, there were a few carefully  
590 selected "common trials" that repeated the exact same high payoff gambles (with identical  $X$  and  $C$ )  
591 across blocks. The authors reported that participants were more likely to gamble on common trials  
592 in Rich environments than Lean environments. This is in line with their economic efficient-coding  
593 model, which predicts subjects allocate more resources to accurately perceive higher payoffs in the  
594 Rich condition where higher payoffs are more frequent (and therefore gamble more on common  
595 trials which are high payoff).

596 To simulate this dataset with OpAL\*, we assumed that the critic state value would reflect the  
597 statistics of the environment. We first set the baseline expectation to reflect the expected value  
598 of a uniform prior over the gamble magnitudes and certain magnitudes in the experiment, which  
599 serves as a prior for environment richness.  $\rho$  was modulated by the learned average gamble offer  
600 in the environment relative to this baseline.<sup>7</sup> As in our earlier risky choice simulations, gambles

<sup>7</sup>This reference-dependent modulation is analogous to our learning experiments, in which the implicit baseline used a mean reward probability of 50%, and where environments with higher estimated reward probabilities were considered "rich" and those below 50% were considered "lean".

One could more generally apply the terms "rich" and "lean" to any values which deviate from a determined baseline, where  $\bar{R}$  represents the estimated richness of the current environment and  $B$  represents the mean of an uninformative prior over the expected outcomes,  $\rho(t) \propto \bar{R}(t) - B$ .  $\rho \geq 0$  would be considered "rich";  $\rho < 0$  would be considered "lean". Indeed, previous work has suggested that of a single environment may be encoded by tonic levels of dopamine, inducing changes in vigor of actions (*Niv et al., 2007*), but does not model changes in the choices themselves as we do here. A similar approach is used in average reward reinforcement learning. Rather than maximizing the total cumulative reward, average reward RL additionally optimizes the average reward per timestep. Reward prediction errors are therefore computed relative to the long-term average

601 were encoded relative to the certain option and G/N values were explicitly set according to the  
602 instructed gamble, omitting the need again for annealing and actor learning rate while preserving  
603 the core dynamics of the full OpAL\*. As found empirically and in the authors' efficient coding model  
604 *Frydman and Jin (2021)*, OpAL\* predicts increased gambling on common trials in the Rich block rel-  
605 ative to the Lean block. According to OpAL\*, this result reflects adaptively modulated DA levels in  
606 the Rich environment which emphasized the benefits of the gamble during decision-making. As  
607 will be discussed below, OpAL\*'s amplification of one striatal subpopulation over another itself can  
608 be considered a form of efficient coding, offering a direct mechanistic explanation for recent find-  
609 ings in economic theory. Finally, note that such findings could not be captured by an alternative  
610 model in which risky choice is driven by surprise or novelty. Note that for both rich and lean blocks,  
611 common trials had larger than usual magnitudes of payoffs. While these payoffs deviated from ex-  
612 pectation to a larger degree in the lean block, this should produce a larger RPE (and presumably  
613 phasic dopamine signal). Given that increased DA in traditional RL models promotes exploitation  
614 (*Humphries et al., 2012*), this account (like the RSRL model above) would predict the opposite pat-  
615 tern than that seen empirically, in this case driving more risky choices in the lean block.

## 616 Discussion

617 Taken together, our simulations provide a normative account for opponency within the basal gan-  
618 glia and its modulation by DA. In particular, we suggest that nonlinear Hebbian mechanisms give  
619 rise to convexity in the learned D1 and D2 actor weights at different ends of the reward spectrum,  
620 which can be differentially leveraged to adapt decision making. To do so, OpAL\* alters its dopamin-  
621 ergic state as a function of environmental richness, so as to best discern between the costs or ben-  
622 efits of available options. Conjecturing that such a mechanism is most profitable when the reward  
623 statistics of the environment are unknown, we posited and found that the online adaptation ro-  
624 bustly outperforms traditional RL and alternative BG models across environment types when sam-  
625 pling across a wide range of plausible parameters. These advantages grow monotonically with the  
626 complexity of the environment (number of alternative actions to choose from). Moreover, the unity  
627 of all three key features of OpAL\* (opponency, three-factor Hebbian nonlinearity, and dynamic DA  
628 modulation) offered particularly unique advantages in sparse reward environments, mitigating  
629 against a particularly pernicious explore-exploit dilemma that arises in such environments. Finally,  
630 we showed how such a mechanism can adapt risky decision making according to environmental  
631 richness, capturing the impact of DA manipulations and individual differences thereof.

632 This paper intersects with theoretical (*Niv et al., 2007*) and empirical work (*Hamid et al., 2015*;  
633 *Mohebi et al., 2019*) investigating how changes in dopaminergic state reflecting reward expecta-  
634 tions impact motivation and vigor. However, this body of literature does not consider how in-  
635 creases or decreases of dopamine affect the decision itself, only its latency or speed. Instead,  
636 OpAL/OpAL\* can capture both shifts in vigor and cost-benefit choice as seen empirically with drug  
637 manipulations across species (*Cousins et al., 1996*; *Salamone et al., 2005*; *Treadway et al., 2012*;  
638 *Westbrook et al., 2020*) and more precise optogenetic manipulations of DA and activity of D1 and  
639 D2 MSNs (*Doi et al., 2020*; *Bolkan et al., 2022*; *Zalocusky et al., 2016*; *Tai et al., 2012*; *Yartsev*  
640 *et al., 2018*). Notably, OpAL\* suggests that in sparse reward environments, it is *adaptive* to lower  
641 dopaminergic levels and not merely avoiding action altogether (as in classical notions of the direct  
642 indirect pathways). Rather, lower dopamine helps to choose actions that minimize cost (by discrim-  
643 inating between D2 MSN populations). In physical effort decision tasks, DA depletion does not sim-  
644 ply induce more noise or reduced effort overall, but selectively promotes actions that minimize ef-  
645 fort when the benefits of exerting effort are relatively low (*Cousins et al., 1996*). For example, while  
646 a healthy rat will choose to climb a barrier to obtain four pellets instead of selecting two pellets  
647 that do not require physical effort, a dopamine-depleted animal will opt for the two-pellet-option.

reward per time step ( $\bar{r}$ ), resulting in  $\delta(t) = r(t) - \bar{r} - V(t)$ .  $\rho$  as operationalized in OpAL\* resembles a prediction error at the task/environment level, though may additionally be influenced by trial-by-trial prediction errors when trials are sufficiently distinct as in the interleaved gambles in *Rutledge et al. (2015)*.

648 However, in the absence of the two pellet option, both healthy and dopamine depleted animals will  
649 select to climb the barrier to collect their reward. While OpAL\* naturally accounts for such findings,  
650 other models often suggest that lowered DA levels would simply produce more randomness and  
651 imprecision, as captured by a reduced softmax gain (*FitzGerald et al., 2015; Cinotti et al., 2019;*  
652 *Eisenegger et al., 2014; Lee et al., 2015*). Importantly, empirical evidence for this reduced gain ac-  
653 count in low DA situations focused exclusively on reward rich situations (i.e., available options were  
654 likely to be rewarding); in these cases OpAL\* also predicts more noise. But as noted above, low  
655 dopaminergic states may not always be maladaptive. Indeed, they may be useful in environments  
656 with sparse rewards, allowing an agent to adaptively navigate exploration and exploitation and to  
657 avoid the most costly options.

658 The work described here builds off a preliminary suggestion in *Collins and Frank (2014)* that  
659 opponency in OpAL confers advantages over standard RL models across rich environments and  
660 lean environments. In particular, when parameters were optimized for each model, the optimal  
661 parameters for standard RL diverged across environments, whereas OpAL could maximize re-  
662 wards across environments with a single set of parameters; biological agents have indeed demon-  
663 strated similar learning speeds between lean and rich environments, demonstrating such cross-  
664 environment flexibility (*Hamid et al., 2015*). However, this previous work applied to a balanced  
665 OpAL model and did not consider how an agent might adaptively modulate dopaminergic state to  
666 differentially weigh costs vs benefits of alternative decisions. In this paper, we showed that such  
667 advantages are robust across a wide range of parameters (not just optimal ones), that they are  
668 amplified in OpAL\*, and that such advantages grow with the complexity of the environment (num-  
669 ber of alternative actions). Importantly, such benefits of OpAL\* capitalize on the nonlinear and  
670 opponency convexity induced by Hebbian plasticity within D1 and D2 pathways (Figure 6a).

671 These findings contrast with other theoretical models of striatal opponency which omit the  
672 Hebbian term but leverage alternate nonlinearities so that, under certain parameter settings, D1  
673 and D2 weights converge to the veridical benefits and costs of an action (*Möller and Bogacz, 2019*).  
674 However, for this convergence to occur requires assumptions about some knowledge of the re-  
675 ward distributions of the environment in advance. Our approach here is to consider how a model  
676 might optimize performance across variable environments with no fore knowledge; as such, OpAL\*  
677 showed robust advantages over these alternative formulations. Such advantages *depended* on the  
678 nonlinear Hebbian mechanism. While the Hebbian term was originally motivated by the biology of  
679 three-factor plasticity as implemented in the neural network version, it is also needed to capture  
680 findings in which D2 MSNs become increasingly potentiated as a result of pathological DA depletion  
681 or DA blockade, leading to aberrant behavioral learning and progression of Parkinsonism (*Wiecki*  
682 *et al., 2009; Beeler et al., 2012*). Ironically, it is this same Hebbian-induced nonlinearity that affords  
683 adaptive performance in OpAL\* when DA is not depleted or manipulated exogenously.<sup>8</sup> Finally,  
684 this adaptive role for activity-dependent Hebbian plasticity beyond standard learning algorithms  
685 is complementary to recent observations that such mechanisms can be leveraged to improve be-  
686 yond gradient descent in neural networks (*Scott and Frank, 2021*). While the computations are  
687 leveraged for different purposes (roughly, choice vs. credit assignment) and in different architec-  
688 tures, both findings accord with the notion that mechanisms typically thought to merely approxi-  
689 mate adaptive functions inspired by artificial intelligence may in fact confer benefits for biological  
690 agents.

691 Lastly, while many studies have documented *that* DA manipulations affect risky and effort based  
692 decision making across species, our results offer a normative explanation for such findings. In this  
693 perspective, the brain treats increases or decreases in dopamine as signaling presence in a richer  
694 or leaner state. Changes in behavior reflect an adaption to this perceived, artificial environmental  
695 change. Hence, a dopamine depleted animal (or increased activity of D2 MSNs in *Zalocusky et al.*  
696 *(2016)*) would focus on costs of actions, whereas dopamine increases would increase attractiveness

<sup>8</sup>While (*Möller and Bogacz, 2019*) identified situations in which this mechanism can produce pathological behavior even without DA depletion, OpAL\* rescues this behavior via normalization and annealing (see Appendix).



697 of risky actions (*Rutledge et al., 2015*). We reasoned that the well known impact of exogenous DA  
698 modulation on risky decision making (*St Onge and Floresco, 2009; Zalocusky et al., 2016; Rutledge*  
699 *et al., 2015*) may be a byproduct of this endogenous adaptive mechanism, showing that OpAL\*  
700 can be used to modulate appropriately when it is worth taking a risk (Figure 8). We then demon-  
701 strated how behavioral effects of D2-receptor activity and manipulation (*Zalocusky et al., 2016*)  
702 reflect unique predictions of OpAL\*, including outcome-dependent risk-avoidance paired with in-  
703 crease of D2-activity following a loss (Figure 9 A-D). In conjunction, optogenetic stimulation of D2-  
704 expressing neurons induced decrease in risky choice in risk-seeking rodents in line with OpAL\*  
705 predictions (Figure 9 E-F). Furthermore, we showed that OpAL\* can be used to capture changes  
706 in risk taking by dopamine-enhancing medication in healthy human participants (Figure 10, A-B).  
707 Our simulations highlighted how individual changes in risk preference may emerge from OpAL\*'s  
708 adaptive mechanism. While some studies have shown that in unique circumstances increased  
709 dopamine may result in preference for a low-risk but low-reward option (*Mikhael and Gershman,*  
710 *2021; St. Onge et al., 2010*), these results rely on sequential effects but nonetheless they may be  
711 explainable by OpAL\*'s sensitivity to environmental reward statistics. Furthermore, we focused  
712 on adaptive decision-making on the time scale of a single task in this paper, and it is plausible  
713 that such an adaptive mechanism may account for larger individual differences across longer time  
714 horizons. For example, increased risk-taking has been well documented in adolescents and some  
715 evidence suggests that dopaminergic levels may peak during adolescents, attributing to this trend  
716 (see (*Wahlstrom et al., 2010a*) for a full review). Speculatively, this may itself be an adaptive mech-  
717 anism, where higher DA may allow more emphasis on potential benefits of risky but developmen-  
718 tally beneficial actions, such as exploring outside of parent's home to find a mate.

719 OpAL\*'s separation and selective amplification of  $G$  and  $N$  actors also is reminiscent of efficient  
720 coding principles in sensory processing, which theorizes that neurons maximize information ca-  
721 pacity by minimizing redundancy in neural representations (*Barlow, 2012; Laughlin, 1981a; Chalk*  
722 *et al., 2018*). Efficient coding also suggests that resources should be reallocated according to fea-  
723 tures in an environment which occur more frequently (*Simoncelli and Olshausen, 2001*). In the  
724 case of OpAL\*, positive prediction errors are more abundant than negative in reward rich envi-  
725 ronments and the  $G$  actor strengthens disproportionately as this asymmetry grows. Conversely,  
726 negative prediction errors are more frequent in reward lean environments and the  $N$  actor spe-  
727 cializes in this asymmetry. Changes in dopaminergic state, which modifies the contribution of  $G$   
728 and  $N$  actors, therefore reallocates decision making resources according to the relative frequency  
729 of positive and negative prediction errors in the environment. Recent behavioral work has applied  
730 an efficient coding framework to risky choice paradigms, showing participants are riskier in en-  
731 vironments which have an increased frequency of large gamble payoffs (*Frydman and Jin, 2021*).  
732 Our model provides a mechanistic account of such findings that generalizes to broader behavioral  
733 implications. Moreover, while the authors did not test this pattern, OpAL\* predicts that if com-  
734 mon trials were administered to include unfavorable gambles (gambles whose expected values  
735 are less than a certain option), people would more reliably select the certain outcome in the lean  
736 environment.

### 737 **Limitations and future directions**

738 A limitation of the DA modulation mechanism is that its performance advantages depend on rela-  
739 tively accurate estimates of environmental richness. Indeed, performance can suffer with incorrect  
740 estimation of the environment richness (Appendix, Figure 11). Thus it is essential in OpAL\* that DA  
741 modulation is dynamic across trials so as to reflect sufficient reward history before modulating op-  
742 ponency. As such, while we systematically characterized the advantage of dynamic DA modulation  
743 in OpAL\* over the balanced OpAL model ( $\rho = 0$ ) across environments, this advantage should hold  
744 over any OpAL model with a fixed asymmetry (see Figure 6a). For robust advantages, the critic  
745 estimation of environmental richness must be relatively confident before modulating DA. In the  
746 simulations presented, we utilized a Bayesian critic to explicitly track such uncertainty, and only

747 increasing or decreasing DA when the estimate was sufficiently confident. Interestingly, this mech-  
748 anism provides an intermediate strategy between directed and random exploration (*Wilson et al.,*  
749 *2014*), but at the level of actor (rather than action) selection. In OpAL\*, such a strategy amounts to  
750 random exploration across both actors until the critic uncertainty is sufficiently reduced, at which  
751 point OpAL\* exploits the actor most specialized to the task. Future directions will investigate how  
752 this strategy may itself be adapted as a function of the environment statistics and may offer poten-  
753 tial predictions for understanding individual differences and/or clinical conditions. For example,  
754 given inappropriate dopaminergic state is most detrimental to sparse reward environments, an  
755 agent which prioritizes avoidance of costs such as those prevalent in sparse reward environments  
756 (such as in OCD or in early life stress) may benefit from more caution before changing dopaminer-  
757 gic state (i.e., have a higher threshold for DA modulation and exploiting knowledge) or take longer  
758 to integrate information to increase precision of estimates (i.e., lower learning rate).

759 There are several future directions to this work. For example, while OpAL\* optimizes a single DA  
760 signal toward the actor most specialized to rich or lean environments, recent work also suggests  
761 that DA signals are not uniform across striatum (*Hamid et al., 2021*). Indeed, this work showed  
762 that DA signals can be tailored to striatal subregions specialized for a given task, keeping with a  
763 "mixture of experts" model to support credit assignment. Future work should thus consider how  
764 the DA signals can be simultaneously adapted to the benefits and costs of alternative actions within  
765 subregions that are most suited to govern behavior. Moreover, while we addressed the impact  
766 of complexity within the action space, an alternative notion of complexity and sparsity yet to be  
767 explored is the length of sequential actions needed to achieve reward. Increasing the distance from  
768 initial choice to reward, a problem faced by modern deep RL algorithms (*Hare, 2019*), may also  
769 benefit from integrating OpAL\*-like opponency and choice modulation into larger architectures.  
770 Finally, while our work focuses on asymmetries afforded in the choice function, DA manipulations  
771 can also induce asymmetries in learning rates from positive and negative RPEs (*Frank et al., 2007a;*  
772 *Niv et al., 2012a; Collins and Frank, 2014*), which can, under some circumstances, be dissociated  
773 from choice effects (*Collins and Frank, 2014*). However, it is certainly possible that asymmetries in  
774 learning rates can also be optimized as a function of the environment. Indeed, larger learning rates  
775 for positive than negative RPEs are beneficial in lean environments (and vice-versa), by amplifying  
776 the less frequent signal (*Cazé and van der Meer, 2013*). Such effects are not mutually exclusive with  
777 those described here, but note that they do not address the issue highlighted above with respect to  
778 exploration exploitation dilemmas that arise in lean environments, and do not capture the various  
779 findings (reviewed above) in which DA manipulations affect performance and choice in absence of  
780 outcomes.

## 781 **Materials and Methods**

### 782 **Parameter grid search**

783 We ran a grid sweep over a parameter space with  $\alpha_a \in [0.1, 1]$  with step size of .1 and  $\beta \in [1, 5]$   
784 with step size of 0.5. To equate the model complexity, the annealing parameter ( $T = 10$ ), the  
785 strength of modulation ( $k = 20$ ), and the confidence needed before modulation ( $\phi = 1.0$ ) were  
786 fixed to the specified values across models. These were determined by coarser grid searches of the  
787 parameter space for reasonable performance of control models. For each parameter combination,  
788 we matched the starting random seed for three models – OpAL\*, OpAL\* with  $\rho = 0$ , and OpAL\*  
789 with no three-factor hebbian term (No Hebb). For each parameter setting for each model type, we  
790 calculated the average softmax probability of selecting the best option (80% in rich environments  
791 or 30% in lean environments) across 5,000 simulations for 500 trials. We then took the area under  
792 the curve (AUC) of this averaged learning curve for different time horizons (50, 100, 250, 500 trials)  
793 and took the difference between the AUCs of OpAL\* and OpAL\* with  $\rho = 0$  or OpAL\* No Hebb of  
794 matched parameters. We conducted a one sample t-test on these differences, where a difference  
795 of zero was the null hypothesis.

796 We conducted the same set of analyses with the learning curves for the actual rewards received  
797 and received mirror results. We therefore only report the analysis according to the probability of  
798 selecting an action which is a finer grain measure of average performance.

### 799 **Moller and Bogacz 2019 model**

800 The Moller and Bogacz model (*Möller and Bogacz, 2019*) offers another computational account of  
801 how benefits and costs may be encoded in the D1/D2 striatal sub-populations. First note that this  
802 model defines benefits and costs as the *absolute magnitude* of positive and negative outcome for  
803 each action. In contrast, benefits and costs as represented in OpAL/OpAL\* are relative metrics that  
804 relate to the proportion of positive and negative prediction errors in an environment (accordingly,  
805 for gamble simulations, an outcome of 0 is encoded as a cost relative to the sure thing, similar to  
806 other models of reference dependence). Second, both OpAL and Moller and Bogacz's model have  
807 nonlinearities in the learning rule (otherwise, as seen in our balanced OpAL model, the two path-  
808 ways are redundant). However, rather than use Hebbian plasticity, Moller and Bogacz transform  
809 the prediction error itself (such that the impact of negative prediction errors is smaller in the G  
810 actor, and vice versa, parametrized by  $\epsilon$ ), and impose a weak decay ( $\lambda$ ), as expressed below.

$$\Delta G(s, a) = \alpha f_{\epsilon}(\delta) - \lambda G(s, a) \quad (28)$$

$$\Delta N(s, a) = \alpha f_{-\epsilon}(\delta) - \lambda N(s, a) \quad (29)$$

$$f_{\epsilon} = \begin{cases} \delta & \text{for } \delta > 0 \\ \epsilon\delta & \text{for } \delta < 0 \end{cases} \quad (30)$$

811 Under certain assumptions about reward distributions and associated parameters, this learn-  
812 ing rule allows the G and N weights to converge to the expected payoffs and costs of alternative  
813 actions. However, as noted above, we are interested here in the general case where reward statis-  
814 tics are not known in advance, and as such we simulated behavior from this model across a range  
815 of parameters, as we did for the other agents, but we also optimized its parameters (see below).

816 To select between actions, we used a softmax policy. While *Möller and Bogacz (2019)* explicitly  
817 do not use a softmax function in their simulations, they did so only because they were simulating  
818 behaviors in which an action may not be selected at all (i.e., they did not subject their agent to  
819 choose between different actions). In contrast, for all of our experiments, our agents must select  
820 an action each trial. We therefore generate a choice as follows using the softmax function by using  
821 the value of the action,  $V(a)$ .

$$V(a) = \frac{1}{2}(G - N) \quad (31)$$

$$p(a) = \frac{e^{\beta V(a)}}{\sum_{i \in A} e^{\beta V(i)}} \quad (32)$$

### 822 **Optimized Models**

823 For each model and for a given set of parameters, the average softmax probability of selecting the  
824 best option for 100 trials was calculated over 1000 simulations in each environment. The mean  
825 performance in rich and lean were then also averaged. Parameters which maximized this final av-  
826 erage were found using SciPy's *differential\_evolution* routine. For plotting, 1000 random seeds were  
827 generated and preserved across all models to start each simulation to minimize model differences  
828 due to noise.

829 For the standard Q-learner, the two free parameters – the learning rate ( $\alpha$ ) and the softmax tem-  
830 perature ( $\beta$ ) – were optimized. Learning rates were bounded between 0 and 1. Softmax tempera-  
831 tures could range between 1 and 50. Optimized parameters were found to be  $\alpha = 0.16$ ,  $\beta = 46.86$ .

832 For each version of OpAL\* optimized – OpAL\*, OpAL\* with  $\rho = 0$ , OpAL\* with no hebbian term  
833 – only the learning rate ( $\alpha$ ) and the softmax temperature ( $\beta$ ) were optimized. As in the grid search  
834 analyses, the annealing parameter ( $T = 10$ ), the strength of modulation ( $k = 20$ ), and the confi-  
835 dence needed before modulation ( $\phi = 1.0$ ) were fixed to equate model complexity and to speed  
836 convergence of the optimization routine. The softmax temperature was also bounded in the op-  
837 timization routine between 1 and 5 to ensure model stability. After optimized values were found,  
838 small deviations in  $T$ ,  $k$  and  $\phi$  were run to ensure results did not rely on the selection of these exact  
839 parameters. Optimized parameters were as follows: OpAL\*,  $\alpha = .84$ ,  $\beta = 2.43$ . OpAL\* with  $\rho = 0$ ,  
840  $\alpha = 0.96$ ,  $\beta = 4.13$ . OpAL\* with no Hebbian term,  $\alpha = .88$ ,  $\beta = 2.90$ .

841 The Moller et al. model was optimized over all four free parameters. See Moller and Bogacz  
842 2019 model for an overview of the model. In order for the model to converge to expected payoffs  
843 and costs, the decay parameter ( $\lambda$ ) must be close to 0 and smaller than the learning rate and the  
844 nonlinearity parameter ( $\epsilon$ ) must be approximately 1. The authors offer a practical way to determine  
845 these constraints by first defining  $c_q \approx 1$  and  $c_s = 1$ , where  $c_q$  and  $c_s$  derive from the equilibrium  
846 equations for the mean spread  $s$  and the mean  $q$  of rewards in the environment if G and N are  
847 to converge to expected payoffs and costs. By first selecting  $c_q$  and  $c_s$  close to one and selecting a  
848 learning rate  $\alpha$ ,  $\epsilon$  and  $\lambda$  can be calculated as follow:

$$\epsilon = \frac{1 - c_s(1/c_q - 1)}{1 + c_s(1/c_q - 1)} \quad (33)$$

$$\lambda = \frac{\alpha(1 - \epsilon)}{2c_s} \quad (34)$$

849 In order to optimize Moller et al.,  $c_q$  and  $c_s$  were bounded between 0.7 and 1 and  $\alpha$  ranged  
850 between 0 and 1. The above equations were then used to calculate  $\epsilon$  and  $\lambda$  during the optimization  
851 procedure. Like the standard Q-learner, the softmax temperature was bounded between 1 and 50.  
852 Optimized parameters:  $\alpha = .07$ ,  $\epsilon = .91$ ,  $\lambda = .004$ ,  $\beta = 30$  using  $c_q = .95$  and  $c_s = .88$ .

## 853 Acknowledgments

854 AJ was partly supported by NIMH training grant T32MH115895 (PI's: Frank, Badre, Moore). The  
855 project was also supported by NIMH R01 MH084840-08A1 and NIMH P50 MH119467-01. Comput-  
856 ing hardware was supported by NIH Office of the Director grant S10OD025181.

## 857 References

- 858 Humans Use Directed and Random Exploration to Solve the Explore-Exploit Dilemma; <https://www.ncbi.nlm.nih.gov/pmc/articles/PMC5635655/>.
- 860 **Barlow HB.** Possible Principles Underlying the Transformations of Sensory Messages. In: Rosenblith WA,  
861 editor. *Sensory Communication* The MIT Press; 2012.p. 216–234. <http://mitpress.universitypressscholarship.com/view/10.7551/mitpress/9780262518420.001.0001/upso-9780262518420-chapter-13>, doi: 10.7551/mit-  
862 press/9780262518420.003.0013.
- 864 **Beeler J**, Frank M, McDaid J, Alexander E, Turkson S, Sol Bernandez M, McGehee D, Zhuang X. A Role  
865 for Dopamine-Mediated Learning in the Pathophysiology and Treatment of Parkinson's Disease. *Cell*  
866 Reports. 2012 Dec; 2(6):1747–1761. <https://linkinghub.elsevier.com/retrieve/pii/S2211124712004111>, doi:  
867 10.1016/j.celrep.2012.11.014.
- 868 **Bolkan SS**, Stone IR, Pinto L, Ashwood ZC, Iravedra Garcia JM, Herman AL, Singh P, Bandi A, Cox J, Zimmerman  
869 CA, Cho JR, Engelhard B, Koay SA, Pillow JW, Witten IB. Strong and opponent contributions of dorsomedial  
870 striatal pathways to behavior depends on cognitive demands and task strategy. *Nature Neuroscience*. 2022  
871 Mar; 25:345–357. <https://doi.org/10.1038/s41593-022-01021-9>, doi: 10.1038/s41593-022-01021-9.
- 872 **Cazé RD**, van der Meer MAA. Adaptive properties of differential learning rates for positive and neg-  
873 ative outcomes. *Biological Cybernetics*. 2013 Dec; 107(6):711–719. <http://link.springer.com/10.1007/s00422-013-0571-5>, doi: 10.1007/s00422-013-0571-5.

- 875 **Chalk M**, Marre O, Tkačik G. Toward a unified theory of efficient, predictive, and sparse coding. *Proceedings*  
876 *of the National Academy of Sciences*. 2018 Jan; 115(1):186–191. <https://www.pnas.org/content/115/1/186>,  
877 [doi: 10.1073/pnas.1711114115](https://doi.org/10.1073/pnas.1711114115), publisher: National Academy of Sciences Section: Biological Sciences.
- 878 **Cinotti F**, Fresno V, Aklil N, Coutureau E, Girard B, Marchand AR, Khamassi M. Dopamine blockade impairs  
879 the exploration-exploitation trade-off in rats. *Scientific Reports*. 2019 May; 9:6770. [https://www.ncbi.nlm.nih.](https://www.ncbi.nlm.nih.gov/pmc/articles/PMC6494917/)  
880 [gov/pmc/articles/PMC6494917/](https://www.ncbi.nlm.nih.gov/pmc/articles/PMC6494917/), doi: 10.1038/s41598-019-43245-z.
- 881 **Collins AGE**, Frank MJ. Opponent actor learning (OpAL): Modeling interactive effects of striatal dopamine on  
882 reinforcement learning and choice incentive. *Psychological Review*. 2014; 121(3):337–366. [http://doi.apa.](http://doi.apa.org/getdoi.cfm?doi=10.1037/a0037015)  
883 [org/getdoi.cfm?doi=10.1037/a0037015](http://doi.apa.org/getdoi.cfm?doi=10.1037/a0037015), doi: 10.1037/a0037015.
- 884 **Cousins MS**, Atherton A, Turner L, Salamone JD. Nucleus accumbens dopamine depletions alter relative re-  
885 sponse allocation in a T-maze cost/benefit task. *Behavioural Brain Research*. 1996 Jan; 74(1-2):189–197.  
886 <https://linkinghub.elsevier.com/retrieve/pii/S0166432895001514>, doi: 10.1016/0166-4328(95)00151-4.
- 887 **Daw ND**, Kakade S, Dayan P. Opponent interactions between serotonin and dopamine. *Neural Networks*. 2002  
888 Jun; 15(4-6):603–616. <https://linkinghub.elsevier.com/retrieve/pii/S0893608002000527>, doi: 10.1016/S0893-  
889 6080(02)00052-7.
- 890 **Dayan P**, Balleine BW. Reward, Motivation, and Reinforcement Learning. *Neuron*. 2002 Oct; 36(2):285–298.  
891 <https://linkinghub.elsevier.com/retrieve/pii/S0896627302009637>, doi: 10.1016/S0896-6273(02)00963-7.
- 892 **Doi T**, Fan Y, Gold JI, Ding L. The caudate nucleus contributes causally to decisions that balance reward  
893 and uncertain visual information. *eLife*. 2020 Jun; 9:e56694. <https://elifesciences.org/articles/56694>, doi:  
894 [10.7554/eLife.56694](https://doi.org/10.7554/eLife.56694).
- 895 **Dunovan K**, Verstynen T. Believer-Skeptic Meets Actor-Critic: Rethinking the Role of Basal Ganglia Pathways  
896 during Decision-Making and Reinforcement Learning. *Frontiers in Neuroscience*. 2016 Mar; 10. [http://journal.](http://journal.frontiersin.org/Article/10.3389/fnins.2016.00106/abstract)  
897 [frontiersin.org/Article/10.3389/fnins.2016.00106/abstract](http://journal.frontiersin.org/Article/10.3389/fnins.2016.00106/abstract), doi: [10.3389/fnins.2016.00106](https://doi.org/10.3389/fnins.2016.00106).
- 898 **Eisenegger C**, Naef M, Linssen A, Clark L, Gandamaneni PK, Müller U, Robbins TW. Role of Dopamine D2  
899 Receptors in Human Reinforcement Learning. *Neuropsychopharmacology*. 2014 Sep; 39(10):2366–2375.  
900 <https://www.nature.com/articles/npp201484>, doi: [10.1038/npp.2014.84](https://doi.org/10.1038/npp.2014.84), bandiera\_abtest: a Cg\_type: Nature  
901 Research Journals Number: 10 Primary\_atype: Research Publisher: Nature Publishing Group Subject\_term:  
902 Decision Subject\_term\_id: decision.
- 903 **FitzGerald THB**, Dolan RJ, Friston K. Dopamine, reward learning, and active inference. *Frontiers in Com-*  
904 *putational Neuroscience*. 2015; 9:136. <https://www.frontiersin.org/article/10.3389/fncom.2015.00136>, doi:  
905 [10.3389/fncom.2015.00136](https://doi.org/10.3389/fncom.2015.00136).
- 906 **Frank MJ**, Moustafa AA, Haughey HM, Curran T, Hutchison KE. Genetic triple dissociation reveals  
907 multiple roles for dopamine in reinforcement learning. *Proceedings of the National Academy of*  
908 *Sciences*. 2007 Oct; 104(41):16311–16316. <http://www.pnas.org/cgi/doi/10.1073/pnas.0706111104>, doi:  
909 [10.1073/pnas.0706111104](https://doi.org/10.1073/pnas.0706111104).
- 910 **Frank MJ**, Moustafa AA, Haughey HM, Curran T, Hutchison KE. Genetic triple dissociation reveals  
911 multiple roles for dopamine in reinforcement learning. *Proceedings of the National Academy of*  
912 *Sciences*. 2007 Oct; 104(41):16311–16316. <http://www.pnas.org/cgi/doi/10.1073/pnas.0706111104>, doi:  
913 [10.1073/pnas.0706111104](https://doi.org/10.1073/pnas.0706111104).
- 914 **Frank MJ**. Dynamic Dopamine Modulation in the Basal Ganglia: A Neurocomputational Account of Cogni-  
915 tive Deficits in Medicated and Nonmedicated Parkinsonism. *Journal of Cognitive Neuroscience*. 2005 Jan;  
916 17(1):51–72. <https://direct.mit.edu/jocn/article/17/1/51-72/3948>, doi: 10.1162/0898929052880093.
- 917 **Frank MJ**, Claus ED. Anatomy of a decision: Striato-orbitofrontal interactions in reinforcement learning, deci-  
918 sion making, and reversal. *Psychological Review*. 2006; doi: [10.1037/0033-295X.113.2.300](https://doi.org/10.1037/0033-295X.113.2.300).
- 919 **Frank MJ**, Seeberger LC, O'Reilly RC. By Carrot or by Stick: Cognitive Reinforcement Learning in Parkinson-  
920 ism. *Science*. 2004 Dec; 306(5703):1940–1943. <https://www.science.org/doi/10.1126/science.1102941>, doi:  
921 [10.1126/science.1102941](https://doi.org/10.1126/science.1102941).
- 922 **Franklin NT**, Frank MJ. A cholinergic feedback circuit to regulate striatal population uncertainty and op-  
923 timize reinforcement learning. *eLife*. 2015 Dec; 4:e12029. <https://elifesciences.org/articles/12029>, doi:  
924 [10.7554/eLife.12029](https://doi.org/10.7554/eLife.12029).

- 925 **Frydman C**, Jin LJ. Efficient Coding and Risky Choice. . 2021; p. 74.
- 926 **Frémaux N**, Gerstner W. Neuromodulated Spike-Timing-Dependent Plasticity, and Theory of Three-Factor  
927 Learning Rules. *Frontiers in Neural Circuits*. 2016 Jan; 9. [http://journal.frontiersin.org/Article/10.3389/fncir.](http://journal.frontiersin.org/Article/10.3389/fncir.2015.00085/abstract)  
928 [2015.00085/abstract](http://journal.frontiersin.org/Article/10.3389/fncir.2015.00085/abstract), doi: [10.3389/fncir.2015.00085](https://doi.org/10.3389/fncir.2015.00085).
- 929 **Gerfen CR**. The neostriatal mosaic: multiple levels of compartmental organization. . 1992; 15(4):7.
- 930 **Gurney KN**, Humphries MD, Redgrave P. A New Framework for Cortico-Striatal Plasticity: Behavioural Theory  
931 Meets In Vitro Data at the Reinforcement-Action Interface. *PLoS Biology*. 2015 Jan; 13(1):e1002034. [https:](https://dx.plos.org/10.1371/journal.pbio.1002034)  
932 [//dx.plos.org/10.1371/journal.pbio.1002034](https://dx.plos.org/10.1371/journal.pbio.1002034), doi: [10.1371/journal.pbio.1002034](https://doi.org/10.1371/journal.pbio.1002034).
- 933 **Hamid AA**, Frank MJ, Moore CI. Wave-like dopamine dynamics as a mechanism for spatiotemporal credit assign-  
934 ment. *Cell*. 2021 May; 184(10):2733–2749.e16. <https://linkinghub.elsevier.com/retrieve/pii/S0092867421003779>,  
935 doi: [10.1016/j.cell.2021.03.046](https://doi.org/10.1016/j.cell.2021.03.046).
- 936 **Hamid AA**, Pettibone JR, Mabrouk OS, Hetrick VL, Schmidt R, Vander Weele CM, Kennedy RT, Aragona BJ, Berke  
937 JD. Mesolimbic dopamine signals the value of work. *Nature Neuroscience*. 2015; doi: [10.1038/nn.4173](https://doi.org/10.1038/nn.4173).
- 938 **Hare J**. Dealing with Sparse Rewards in Reinforcement Learning. arXiv:191009281 [cs, stat]. 2019 Nov; [http:](http://arxiv.org/abs/1910.09281)  
939 [//arxiv.org/abs/1910.09281](http://arxiv.org/abs/1910.09281), arXiv: 1910.09281.
- 940 **Harun R**, Hare KM, Brough EM, Munoz MJ, Grassi CM, Torres GE, Grace AA, Wagner AK. Fast-scan  
941 cyclic voltammetry demonstrates that L-DOPA produces dose-dependent, regionally selective bi-  
942 modal effects on striatal dopamine kinetics in vivo. *Journal of Neurochemistry*. 2016; 136(6):1270–  
943 1283. <https://onlinelibrary.wiley.com/doi/abs/10.1111/jnc.13444>, doi: [10.1111/jnc.13444](https://doi.org/10.1111/jnc.13444),  
944 [\\_eprint:](https://onlinelibrary.wiley.com/doi/pdf/10.1111/jnc.13444)  
<https://onlinelibrary.wiley.com/doi/pdf/10.1111/jnc.13444>.
- 945 **Humphries M**, Khamassi M, Gurney K. Dopaminergic control of the exploration-exploitation trade-off via the  
946 basal ganglia. *Frontiers in Neuroscience*. 2012; 6. <https://www.frontiersin.org/article/10.3389/fnins.2012.00009>.
- 947 **Iino Y**, Sawada T, Yamaguchi K, Tajiri M, Ishii S, Kasai H, Yagishita S. Dopamine D2 receptors in discrimination  
948 learning and spine enlargement. *Nature*. 2020 Mar; 579(7800):555–560. [http://www.nature.com/articles/](http://www.nature.com/articles/s41586-020-2115-1)  
949 [s41586-020-2115-1](http://www.nature.com/articles/s41586-020-2115-1), doi: [10.1038/s41586-020-2115-1](https://doi.org/10.1038/s41586-020-2115-1).
- 950 **Kahneman D**, Tversky A. Prospect Theory: An Analysis of Decision under Risk. *Econometrica*. 1979 Mar;  
951 47(2):263. <https://www.jstor.org/stable/1914185?origin=crossref>, doi: [10.2307/1914185](https://doi.org/10.2307/1914185).
- 952 **Laughlin S**. A Simple Coding Procedure Enhances a Neuron's Information Capacity. *Zeitschrift*  
953 *für Naturforschung C*. 1981 Oct; 36(9-10):910–912. [https://www.degruyter.com/document/doi/10.1515/](https://www.degruyter.com/document/doi/10.1515/znc-1981-9-1040/html)  
954 [znc-1981-9-1040/html](https://www.degruyter.com/document/doi/10.1515/znc-1981-9-1040/html), doi: [10.1515/znc-1981-9-1040](https://doi.org/10.1515/znc-1981-9-1040).
- 955 **Laughlin S**. A Simple Coding Procedure Enhances a Neuron's Information Capacity. *Zeitschrift*  
956 *für Naturforschung C*. 1981 Oct; 36(9-10):910–912. [https://www.degruyter.com/document/doi/10.1515/](https://www.degruyter.com/document/doi/10.1515/znc-1981-9-1040/html)  
957 [znc-1981-9-1040/html](https://www.degruyter.com/document/doi/10.1515/znc-1981-9-1040/html), doi: [10.1515/znc-1981-9-1040](https://doi.org/10.1515/znc-1981-9-1040).
- 958 **Lee E**, Seo M, Monte OD, Averbeck BB. Injection of a Dopamine Type 2 Receptor Antagonist into the Dorsal Stria-  
959 tum Disrupts Choices Driven by Previous Outcomes, But Not Perceptual Inference. *Journal of Neuroscience*.  
960 2015 Apr; 35(16):6298–6306. <https://www.jneurosci.org/content/35/16/6298>, doi: [10.1523/JNEUROSCI.4561-](https://doi.org/10.1523/JNEUROSCI.4561-14.2015)  
961 [14.2015](https://doi.org/10.1523/JNEUROSCI.4561-14.2015), publisher: Society for Neuroscience Section: Articles.
- 962 **Lloyd K**, Dayan P. Tamping Ramping: Algorithmic, Implementational, and Computational Explanations of Pha-  
963 sic Dopamine Signals in the Accumbens. *PLOS Computational Biology*. 2015 Dec; 11(12):e1004622. [https:](https://journals.plos.org/ploscompbiol/article?id=10.1371/journal.pcbi.1004622)  
964 [//journals.plos.org/ploscompbiol/article?id=10.1371/journal.pcbi.1004622](https://journals.plos.org/ploscompbiol/article?id=10.1371/journal.pcbi.1004622), doi: [10.1371/journal.pcbi.1004622](https://doi.org/10.1371/journal.pcbi.1004622),  
965 publisher: Public Library of Science.
- 966 **Maia TV**, Frank MJ. An Integrative Perspective on the Role of Dopamine in Schizophrenia. *Biologi-  
967 cal Psychiatry*. 2017 Jan; 81(1):52–66. <https://linkinghub.elsevier.com/retrieve/pii/S0006322316324258>, doi:  
968 [10.1016/j.biopsych.2016.05.021](https://doi.org/10.1016/j.biopsych.2016.05.021).
- 969 **Mikhael JG**, Bogacz R. Learning Reward Uncertainty in the Basal Ganglia. *PLoS Computational Biology*. 2016;  
970 doi: [10.1371/journal.pcbi.1005062](https://doi.org/10.1371/journal.pcbi.1005062).
- 971 **Mikhael JG**, Gershman SJ. Impulsivity and risk-seeking as Bayesian inference under dopaminergic con-  
972 trol. *Neuropsychopharmacology*. 2021 Aug; <https://www.nature.com/articles/s41386-021-01125-z>, doi:  
973 [10.1038/s41386-021-01125-z](https://doi.org/10.1038/s41386-021-01125-z).

- 974 **Mohebi A**, Pettibone JR, Hamid AA, Wong JMT, Vinson LT, Patriarchi T, Tian L, Kennedy RT, Berke JD. Dissociable  
975 dopamine dynamics for learning and motivation. *Nature*. 2019 Jun; 570(7759):65–70. <http://www.nature.com/articles/s41586-019-1235-y>, doi: 10.1038/s41586-019-1235-y.
- 977 **Montague P**, Dayan P, Sejnowski T. A framework for mesencephalic dopamine systems based on predictive  
978 Hebbian learning. *The Journal of Neuroscience*. 1996 Mar; 16(5):1936–1947. <https://www.jneurosci.org/lookup/doi/10.1523/JNEUROSCI.16-05-01936.1996>, doi: 10.1523/JNEUROSCI.16-05-01936.1996.
- 980 **Möller M**, Bogacz R. Learning the payoffs and costs of actions. *PLOS Computational Biology*. 2019 Feb;  
981 15(2):e1006285. <https://dx.plos.org/10.1371/journal.pcbi.1006285>, doi: 10.1371/journal.pcbi.1006285.
- 982 **Niv Y**, Edlund JA, Dayan P, O'Doherty JP. Neural Prediction Errors Reveal a Risk-Sensitive Reinforcement-  
983 Learning Process in the Human Brain. *Journal of Neuroscience*. 2012 Jan; 32(2):551–562. <https://www.jneurosci.org/lookup/doi/10.1523/JNEUROSCI.5498-10.2012>, doi: 10.1523/JNEUROSCI.5498-10.2012.
- 985 **Niv Y**, Edlund JA, Dayan P, O'Doherty JP. Neural Prediction Errors Reveal a Risk-Sensitive Reinforcement-  
986 Learning Process in the Human Brain. *Journal of Neuroscience*. 2012 Jan; 32(2):551–562. <https://www.jneurosci.org/lookup/doi/10.1523/JNEUROSCI.5498-10.2012>, doi: 10.1523/JNEUROSCI.5498-10.2012.
- 988 **Niv Y**. Reinforcement learning in the brain. *Journal of Mathematical Psychology*. 2009 Jun; 53(3):139–154.  
989 <https://linkinghub.elsevier.com/retrieve/pii/S0022249608001181>, doi: 10.1016/j.jmp.2008.12.005.
- 990 **Niv Y**, Daw ND, Joel D, Dayan P. Tonic dopamine: opportunity costs and the control of response vigor.  
991 *Psychopharmacology*. 2007 Mar; 191(3):507–520. <http://link.springer.com/10.1007/s00213-006-0502-4>, doi:  
992 10.1007/s00213-006-0502-4.
- 993 **Pessiglione M**, Seymour B, Flandin G, Dolan RJ, Frith CD. Dopamine-dependent prediction errors underpin  
994 reward-seeking behaviour in humans. *Nature*. 2006 Aug; 442(7106):1042–1045. <http://www.nature.com/articles/nature05051>, doi: 10.1038/nature05051.
- 996 **Pessiglione M**, Seymour B, Flandin G, Dolan RJ, Frith CD. Dopamine-dependent prediction errors underpin  
997 reward-seeking behaviour in humans. *Nature*. 2006 Aug; 442(7106):1042–1045. <http://www.nature.com/articles/nature05051>, doi: 10.1038/nature05051.
- 999 **Qi L**, Thomas E, White SH, Smith SK, Lee CA, Wilson LR, Sombers LA. Unmasking the Effects of L-DOPA on  
1000 Rapid Dopamine Signaling with an Improved Approach for Nafion Coating Carbon-Fiber Microelectrodes.  
1001 *Analytical Chemistry*. 2016 Aug; 88(16):8129–8136. <https://pubs.acs.org/doi/10.1021/acs.analchem.6b01871>,  
1002 doi: 10.1021/acs.analchem.6b01871.
- 1003 **Ratcliff R**, Frank MJ. Reinforcement-Based Decision Making in Corticostriatal Circuits: Mutual Constraints by  
1004 Neurocomputational and Diffusion Models. *Neural Computation*. 2012 May; 24(5):1186–1229. <https://direct.mit.edu/neco/article/24/5/1186-1229/7757>, doi: 10.1162/NECO\_a\_00270.
- 1006 **Reynolds JNJ**, Wickens JR. Dopamine-dependent plasticity of corticostriatal synapses. *Neural Networks*. 2002  
1007 Jun; 15(4-6):507–521. <https://linkinghub.elsevier.com/retrieve/pii/S089360800200045X>, doi: 10.1016/S0893-  
1008 6080(02)00045-X.
- 1009 **Rutledge RB**, Skandali N, Dayan P, Dolan RJ. Dopaminergic Modulation of Decision Making and Subjective Well-  
1010 Being. *Journal of Neuroscience*. 2015 Jul; 35(27):9811–9822. <https://www.jneurosci.org/lookup/doi/10.1523/JNEUROSCI.0702-15.2015>, doi: 10.1523/JNEUROSCI.0702-15.2015.
- 1012 **Salamone J**, Correa M, Mingote S, Weber S. Beyond the reward hypothesis: alternative functions of nucleus  
1013 accumbens dopamine. *Current Opinion in Pharmacology*. 2005 Feb; 5(1):34–41. <https://linkinghub.elsevier.com/retrieve/pii/S1471489204002000>, doi: 10.1016/j.coph.2004.09.004.
- 1015 **Salamone JD**, Correa M, Nunes EJ, Randall PA, Pardo M. The Behavioral Pharmacology of Effort-related Choice  
1016 Behavior: Dopamine, Adenosine and Beyond. *Journal of the Experimental Analysis of Behavior*. 2012 Jan;  
1017 97(1):125–146. <https://www.ncbi.nlm.nih.gov/pmc/articles/PMC3266736/>, doi: 10.1901/jeab.2012.97-125.
- 1018 **Salamone JD**, Correa M, Yang JH, Rotolo R, Presby R. Dopamine, Effort-Based Choice, and Behavioral Economics:  
1019 Basic and Translational Research. *Frontiers in Behavioral Neuroscience*. 2018; 12:52. <https://www.frontiersin.org/article/10.3389/fnbeh.2018.00052>, doi: 10.3389/fnbeh.2018.00052.
- 1020  
1021 **Schultz W**, Dayan P, Montague PR. A neural substrate of prediction and reward. *Science*. 1997; doi: 10.1126/sci-  
1022 ence.275.5306.1593.

- 1023 **Scott DN**, Frank MJ. Beyond gradients: Noise correlations control Hebbian plasticity to shape credit assignment.  
1024 bioRxiv. 2021; .
- 1025 **Simoncelli EP**, Olshausen BA. Natural Image Statistics and Neural Representation. Annual Review of Neuro-  
1026 science. 2001 Mar; 24(1):1193–1216. <https://www.annualreviews.org/doi/10.1146/annurev.neuro.24.1.1193>, doi:  
1027 [10.1146/annurev.neuro.24.1.1193](https://doi.org/10.1146/annurev.neuro.24.1.1193).
- 1028 **St Onge JR**, Chiu YC, Floresco SB. Differential effects of dopaminergic manipulations on risky  
1029 choice. Psychopharmacology. 2010 Aug; 211(2):209–221. <https://doi.org/10.1007/s00213-010-1883-y>, doi:  
1030 [10.1007/s00213-010-1883-y](https://doi.org/10.1007/s00213-010-1883-y).
- 1031 **St Onge JR**, Floresco SB. Dopaminergic Modulation of Risk-Based Decision Making. Neuropsychopharmacology.  
1032 2009 Feb; 34(3):681–697. <http://www.nature.com/articles/npp2008121>, doi: [10.1038/npp.2008.121](https://doi.org/10.1038/npp.2008.121).
- 1033 **Sutton RS**, Barto AG. Reinforcement Learning. Second ed. Cambridge, MA: MIT Press; 2018. [http://](http://incompleteideas.net/book/RLbook2020.pdf)  
1034 [incompleteideas.net/book/RLbook2020.pdf](http://incompleteideas.net/book/RLbook2020.pdf).
- 1035 **Tai LH**, Lee AM, Benavidez N, Bonci A, Wilbrecht L. Transient stimulation of distinct subpopulations of stri-  
1036 atal neurons mimics changes in action value. Nature Neuroscience. 2012 Sep; 15(9):1281–1289. doi:  
1037 [10.1038/nn.3188](https://doi.org/10.1038/nn.3188).
- 1038 **Tobler PN**, Fiorillo CD, Schultz W. Adaptive coding of reward value by dopamine neurons. Science (New York,  
1039 NY). 2005 Mar; 307(5715):1642–1645. doi: [10.1126/science.1105370](https://doi.org/10.1126/science.1105370).
- 1040 **Treadway MT**, Buckholtz JW, Cowan RL, Woodward ND, Li R, Ansari MS, Baldwin RM, Schwartzman AN,  
1041 Kessler RM, Zald DH. Dopaminergic Mechanisms of Individual Differences in Human Effort-Based Decision-  
1042 Making. Journal of Neuroscience. 2012 May; 32(18):6170–6176. [https://www.jneurosci.org/lookup/doi/10.](https://www.jneurosci.org/lookup/doi/10.1523/JNEUROSCI.6459-11.2012)  
1043 [1523/JNEUROSCI.6459-11.2012](https://www.jneurosci.org/lookup/doi/10.1523/JNEUROSCI.6459-11.2012), doi: [10.1523/JNEUROSCI.6459-11.2012](https://doi.org/10.1523/JNEUROSCI.6459-11.2012).
- 1044 **Voon V**, Pessiglione M, Brezing C, Gallea C, Fernandez HH, Dolan RJ, Hallett M. Mechanisms Underlying  
1045 Dopamine-Mediated Reward Bias in Compulsive Behaviors. Neuron. 2010 Jan; 65(1):135–142. [https://](https://linkinghub.elsevier.com/retrieve/pii/S0896627309010459)  
1046 [linkinghub.elsevier.com/retrieve/pii/S0896627309010459](https://linkinghub.elsevier.com/retrieve/pii/S0896627309010459), doi: [10.1016/j.neuron.2009.12.027](https://doi.org/10.1016/j.neuron.2009.12.027).
- 1047 **Wahlstrom D**, Collins P, White T, Luciana M. Developmental changes in dopamine neurotransmission in ado-  
1048 lescence: Behavioral implications and issues in assessment. Brain and Cognition. 2010 Feb; 72(1):146–159.  
1049 <https://linkinghub.elsevier.com/retrieve/pii/S027826260900205X>, doi: [10.1016/j.bandc.2009.10.013](https://doi.org/10.1016/j.bandc.2009.10.013).
- 1050 **Wahlstrom D**, Collins P, White T, Luciana M. Developmental changes in dopamine neurotransmission in ado-  
1051 lescence: Behavioral implications and issues in assessment. Brain and Cognition. 2010 Feb; 72(1):146–159.  
1052 <https://linkinghub.elsevier.com/retrieve/pii/S027826260900205X>, doi: [10.1016/j.bandc.2009.10.013](https://doi.org/10.1016/j.bandc.2009.10.013).
- 1053 **Westbrook A**, van den Bosch R, Määttä JI, Hofmans L, Papadopetraki D, Cools R, Frank MJ. Dopamine pro-  
1054 motes cognitive effort by biasing the benefits versus costs of cognitive work. Science. 2020; doi: [10.1126/sci-](https://doi.org/10.1126/science.aaz5891)  
1055 [ence.aaz5891](https://doi.org/10.1126/science.aaz5891).
- 1056 **Wiecki TV**, Riedinger K, von Ameln-Mayerhofer A, Schmidt WJ, Frank MJ. A neurocomputational account of  
1057 catalepsy sensitization induced by D2 receptor blockade in rats: context dependency, extinction, and re-  
1058 newal. Psychopharmacology. 2009 Jun; 204(2):265–277. <http://link.springer.com/10.1007/s00213-008-1457-4>,  
1059 doi: [10.1007/s00213-008-1457-4](https://doi.org/10.1007/s00213-008-1457-4).
- 1060 **Wilson RC**, Geana A, White JM, Ludvig EA, Cohen JD. Humans use directed and random exploration to solve  
1061 the explore–exploit dilemma. Journal of Experimental Psychology: General. 2014; 143(6):2074–2081. [http://](http://doi.apa.org/getdoi.cfm?doi=10.1037/a0038199)  
1062 [doi.apa.org/getdoi.cfm?doi=10.1037/a0038199](http://doi.apa.org/getdoi.cfm?doi=10.1037/a0038199), doi: [10.1037/a0038199](https://doi.org/10.1037/a0038199).
- 1063 **Yartsev MM**, Hanks TD, Yoon AM, Brody CD. Causal contribution and dynamical encoding in the stri-  
1064 atum during evidence accumulation. eLife. 2018 Aug; 7:e34929. <https://doi.org/10.7554/eLife.34929>, doi:  
1065 [10.7554/eLife.34929](https://doi.org/10.7554/eLife.34929), publisher: eLife Sciences Publications, Ltd.
- 1066 **Yttri EA**, Dudman JT. Opponent and bidirectional control of movement velocity in the basal ganglia. Nature.  
1067 2016; doi: [10.1038/nature17639](https://doi.org/10.1038/nature17639).
- 1068 **Zalocusky KA**, Ramakrishnan C, Lerner TN, Davidson TJ, Knutson B, Deisseroth K. Nucleus accumbens D2R  
1069 cells signal prior outcomes and control risky decision-making. Nature. 2016; doi: [10.1038/nature17400](https://doi.org/10.1038/nature17400).



## 1070 Appendix

### 1071 Incorrect modulation impairs performance

1072 As noted in the main text, it is important that the critic estimate of environmental richness is rea-  
1073 sonably accurate (on the correct side of 0.5) for OpAL\* to confer advantages. Indeed, pathological  
1074 behavior arises if DA states are altered in opposing direction to environmental richness. In Ap-  
1075 pendix Figure 11 we see the effect of flipping the sign of OpAL\*'s calculation of dopaminergic state  
1076 (Equation 17). For this demonstration, if the critic of OpAL\* estimated that it was in a rich envi-  
1077 ronment (positive value of  $\rho$ , high dopaminergic state), it would emphasize the N instead of G  
1078 actor (as if it were in a lean environment). We see that the lean environment shows high sensitiv-  
1079 ity to incorrect modulation. The rich environment shows greater robustness but nonetheless has  
1080 decreased performance in comparison to the standard simulations. This result confirms that the  
1081 direction of modulation in OpAL\* is important, and moreover that it is particularly important to  
1082 have lower DA in lean environments.

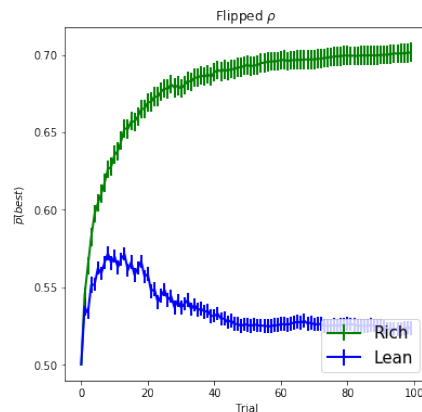

**Appendix 0 Figure 11.** Effects of dopaminergic states which inaccurately reflect environmental richness. Parameters for OpAL\* as outlined in the section Optimized Models were used for these simulations.

### 1083 Comparison to softmax temperature modulation

1084 As noted in the main text, OpAL\* confers larger benefits in lean environments, in part by mitigat-  
1085 ing against an exploration/exploitation dilemma. In particular, during early learning, OpAL\* relies  
1086 on both actors equally and thereby distributes its policy more randomly, but after it estimates  
1087 the richness of the environment, it exploits the more specialized actor. To evaluate whether sim-  
1088 ilar benefits could be mimicked by simply increasing softmax gain over trials (transitioning from  
1089 exploration to exploitation), we considered an OpAL\* variant which symmetrically increased the  
1090 softmax temperature according equally across the G and the N actor. As the richness (or lean-  
1091 ness) of the environment grew, the agent would progressively exploit both actors equally, using  
1092 the same Bayesian critic as in OpAL\*.

$$\beta_g = \beta \max(0, 1 + |\rho_t|) \quad (35)$$

$$\beta_n = \beta \max(0, 1 + |\rho_t|) \quad (36)$$

1093 Given the difference in exploration-exploitation demands across rich and lean environments,  
1094 we compared the average AUCs of OpAL\* and Beta-modulation (B-Mod). Overall we found that  
1095 OpAL\* exhibited improved maximal cross-environment robustness and specifically improved max-  
1096 imal performance in the lean environment. Thus, global changes in explore-exploit the softmax  
1097 temperature alone are insufficient to capture the full performance benefit in lean environments  
1098 induced by dopaminergic modulation in OpAL\*, which capitalizes on specialized learned represen-  
1099 tations across actors.

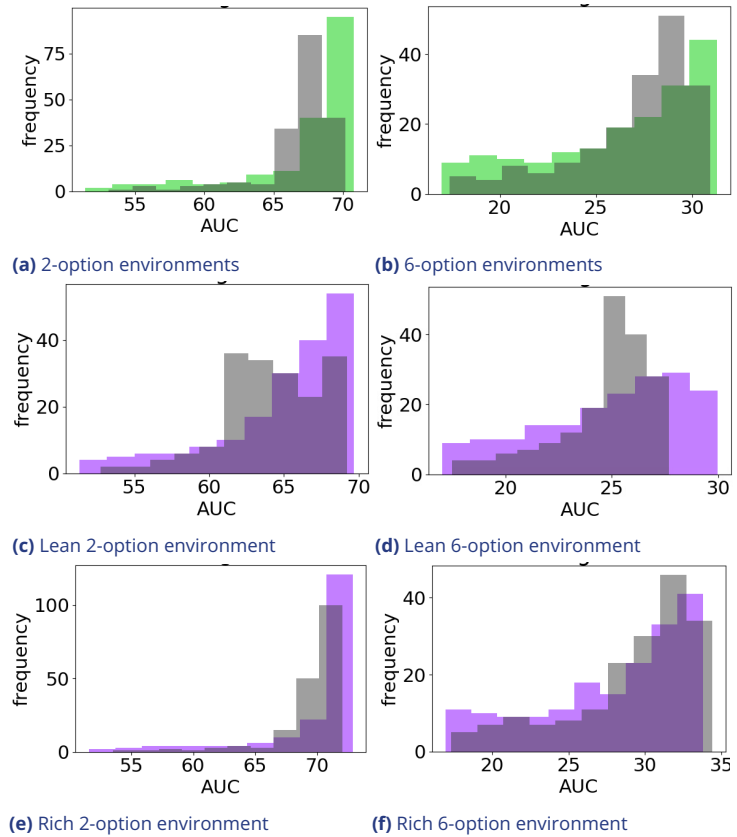

**Appendix 0 Figure 12.** Comparison of OpAL\* to dynamic modulation of softmax temperature (bmod). Figure shows average AUCs of models for fixed parameter in both lean and rich environments for varying complexity. Top: AUCs averaged across both rich and lean environments for a given parameter. Green - OpAL\*, Grey - BMod. Middle/Bottom: AUC histograms for different environments and varying complexity levels. Purple - OpAL\*, Grey - BMod.

## 1100 **Nonlinear dynamics forego veridicality for flexibility**

1101 Addressing *Möller and Bogacz (2019)*

1102 We incorporated normalization and weight decay for the actors to address weaknesses of the orig-  
1103 inal OpAL model raised by *Möller and Bogacz (2019)*. The (valid) critique outlined by *Möller and*  
1104 *Bogacz (2019)* is that its three-factor hebbian update, in carefully constructed situations, gives rise  
1105 to unstable actor dynamics. They demonstrated that when OpAL is sequentially presented with  
1106 a reward of 2 followed by a cost of -1, the dynamics of G and N rapidly converge to 0 (Figure 13,  
1107 left). As described in their text (Equations 39-41), stable oscillations in reward prediction errors  
1108 cause G and N values to converge towards zero. This is indeed a characteristic of the OpAL model,  
1109 especially once the critic begins to converge.<sup>9</sup>

1110 The rapid decay evident in Figure 13, left, was constructed to highlight a particularly pernicious  
1111 example of this issue. The following simulations suggest that the introduction of larger reward  
1112 magnitudes, rather than the oscillating PEs, have driven such instability. Larger reward magni-  
1113 tudes yield larger reward prediction error signals, that in turn yield larger G/N values as evident  
1114 by Equations 4 and 5, which, through the Hebbian positive feedback cycle, further increase learn-  
1115 ing rate. One simple correction is to simply rescale and shrink the magnitudes by some constant  
1116 ( $0 < c < 1$ ); this slows decay in this example (simulations not shown).

1117 We introduced two modifications in OpAL\* to address these concerns. First, prediction errors  
1118 used to update G and N actors (Equations 21 and 22) are normalized by the range of known reward  
1119 magnitudes in the environment (Equation 24). Importantly, OpAL\* is not provided any reward  
1120 statistics beyond the range of reward feedback, and in theory this value could be adjusted as the  
1121 agent learns, reflecting how dopamine neurons rapidly adapt to the range of reward values in the  
1122 environment *Tobler et al. (2005)*.

1123 Figure 13, center, shows the effect of normalization for the example in question. We see that  
1124 the rapid decay is substantially decreased, and simulating into a farther time horizon of 100 trials  
1125 shows a trend toward, but not final convergence at, zero (Figure 13, right). (Note OpAL\* behaves  
1126 well for several hundred trials in the experiments we simulated in this paper). While there remains  
1127 a general decay over time, as previously stated, the behavior is reminiscent of advantage learning  
1128 curves, which have the positive feature that such decay can encourage the agent to explore after  
1129 many trials in the event the world has changed. Furthermore, it is plausible that other learning  
1130 mechanisms, such as more habitual stimulus-response learning, also contribute to choice after  
1131 many learning trials (*Frank and Claus, 2006*). Thus striatal weight decay, which has been docu-  
1132 mented empirically (*Yttri and Dudman, 2016*), may not be detrimental for procedural performance.  
1133 Normalizing, therefore, addresses the valid concerns of *Möller and Bogacz (2019)* while still pre-  
1134 serving core OpAL dynamics, which allow it to capture a range of biological phenomenon as well  
1135 as hypotheses for advantages of dopaminergic states presented in this paper.

1136 Secondly, to address the original issue raised by *Möller and Bogacz (2019)* that OpAL weights  
1137 decay with oscillating prediction errors, we introduced annealing of the actor learning rate. This is  
1138 a common addition to reinforcement learning algorithms where the learning rate is large in early  
1139 stages of learning to avoid local minimums and slowly decreases with time to protect values in  
1140 later stages of learning from rapid updating. (To allow for change points in reward statistics, other  
1141 mechanisms capturing the effects of cholinergic interneurons have been shown to be useful in BG  
1142 networks and OpAL variants, *Franklin and Frank (2015)*). Figure 13, right, shows that while actor  
1143 weights still decrease with the addition of annealing, they no longer converge to zero and lose all  
1144 prior learning as demonstrated in *Möller and Bogacz (2019)*.

<sup>9</sup>Arguably, this decay could be akin to an advantage-learning action value curve, such that once the critic begins to converge, the "advantage" of the option (difference between the action value and the average value of the environment) decreases overtime (*Dayan and Balleine, 2002*). In neural network versions of our BG model, striatal action selection is only required for early learning; once a policy is repeated sufficiently, the cortex can directly select an action in a stimulus-response fashion *Frank and Claus (2006)*

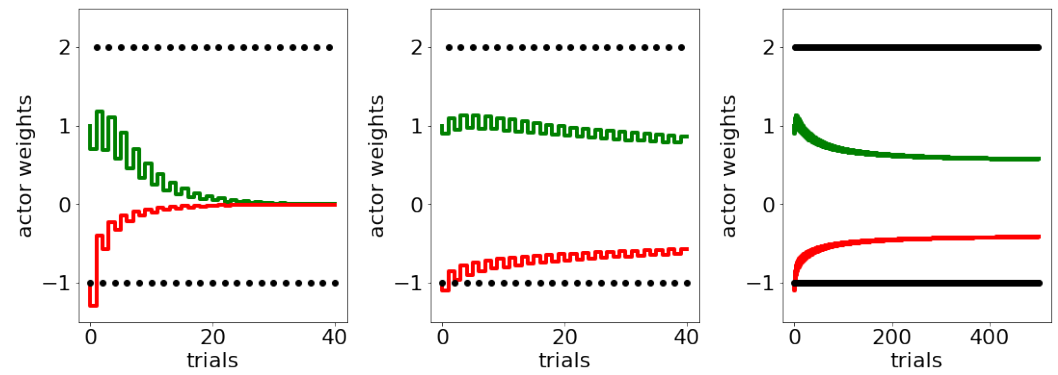

Appendix 0 Figure 13.  $\alpha_c = .3$ ,  $\alpha_a = .3$ . Middle, Left figure:  $T = 50$ , normalization = 3
